# Supplementary material for: Iron(ii) and zinc(ii) monohelical binaphthyl-salen complexes with overlapping benz[a]anthryl sidearms
Source: Royal Society of Chemistry journal article supplement (doi:10.1039/b700001d), 2007-01-01
Supplement: b700001d.pdf [file b700001d.pdf]

**Iron(II) and zinc(II) monohelical binaphthyl-salen complexes with overlapping benz[a]anthryl sidearms**

Alexander V. Wiznycia, John Desper and Christopher J. Levy

**$^1\text{H}$  and  $^{13}\text{C}$  NMR Spectra for Reported Compounds**

Electronic Supplementary Information for Dalton Transactions  
This journal is © The Royal Society of Chemistry 2007

STANDARD 1H OBSERVE

Pulse Sequence: s2pul

Solvent: CDCl<sub>3</sub>

Ambient temperature

File: al-3-282

UNITYplus-400 "bones"

Relax. delay 1.000 sec

Pulse 90.0 degrees

Acq. time 3.701 sec

Width 6000.6 Hz

60 repetitions

OBSERVE H1, 399.8118668 MHz

DATA PROCESSING

Resol. enhancement -0.0 Hz

FT size 32768

Total time 25 min, 7 sec

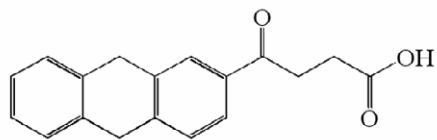

2

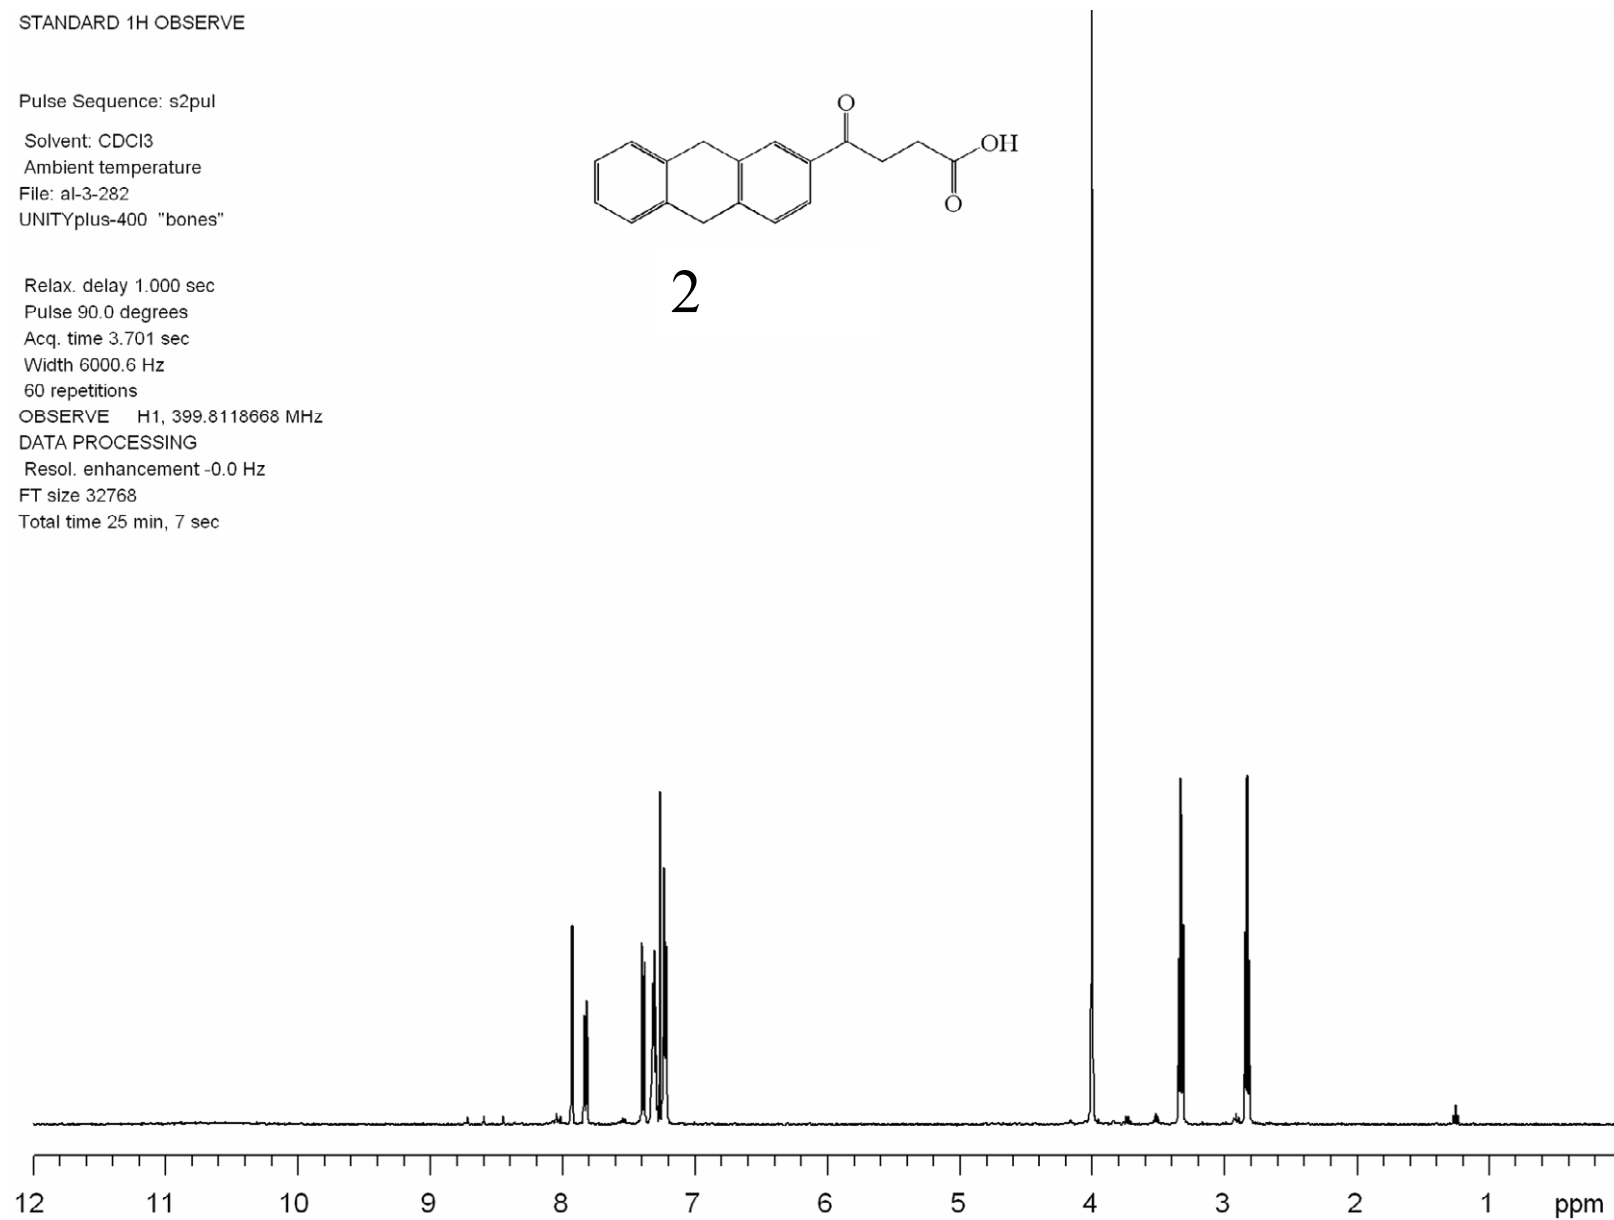

Electronic Supplementary Information for Dalton Transactions  
This journal is © The Royal Society of Chemistry 2007

STANDARD 1H OBSERVE

Pulse Sequence: s2pul

Solvent: CDCl<sub>3</sub>

Ambient temperature

File: al-3-284

UNITYplus-400 "bones"

Relax. delay 1.000 sec

Pulse 90.0 degrees

Acq. time 3.701 sec

Width 6000.6 Hz

32 repetitions

OBSERVE H1, 399.8118668 MHz

DATA PROCESSING

Resol. enhancement -0.0 Hz

FT size 32768

Total time 25 min, 7 sec

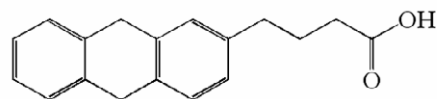

3

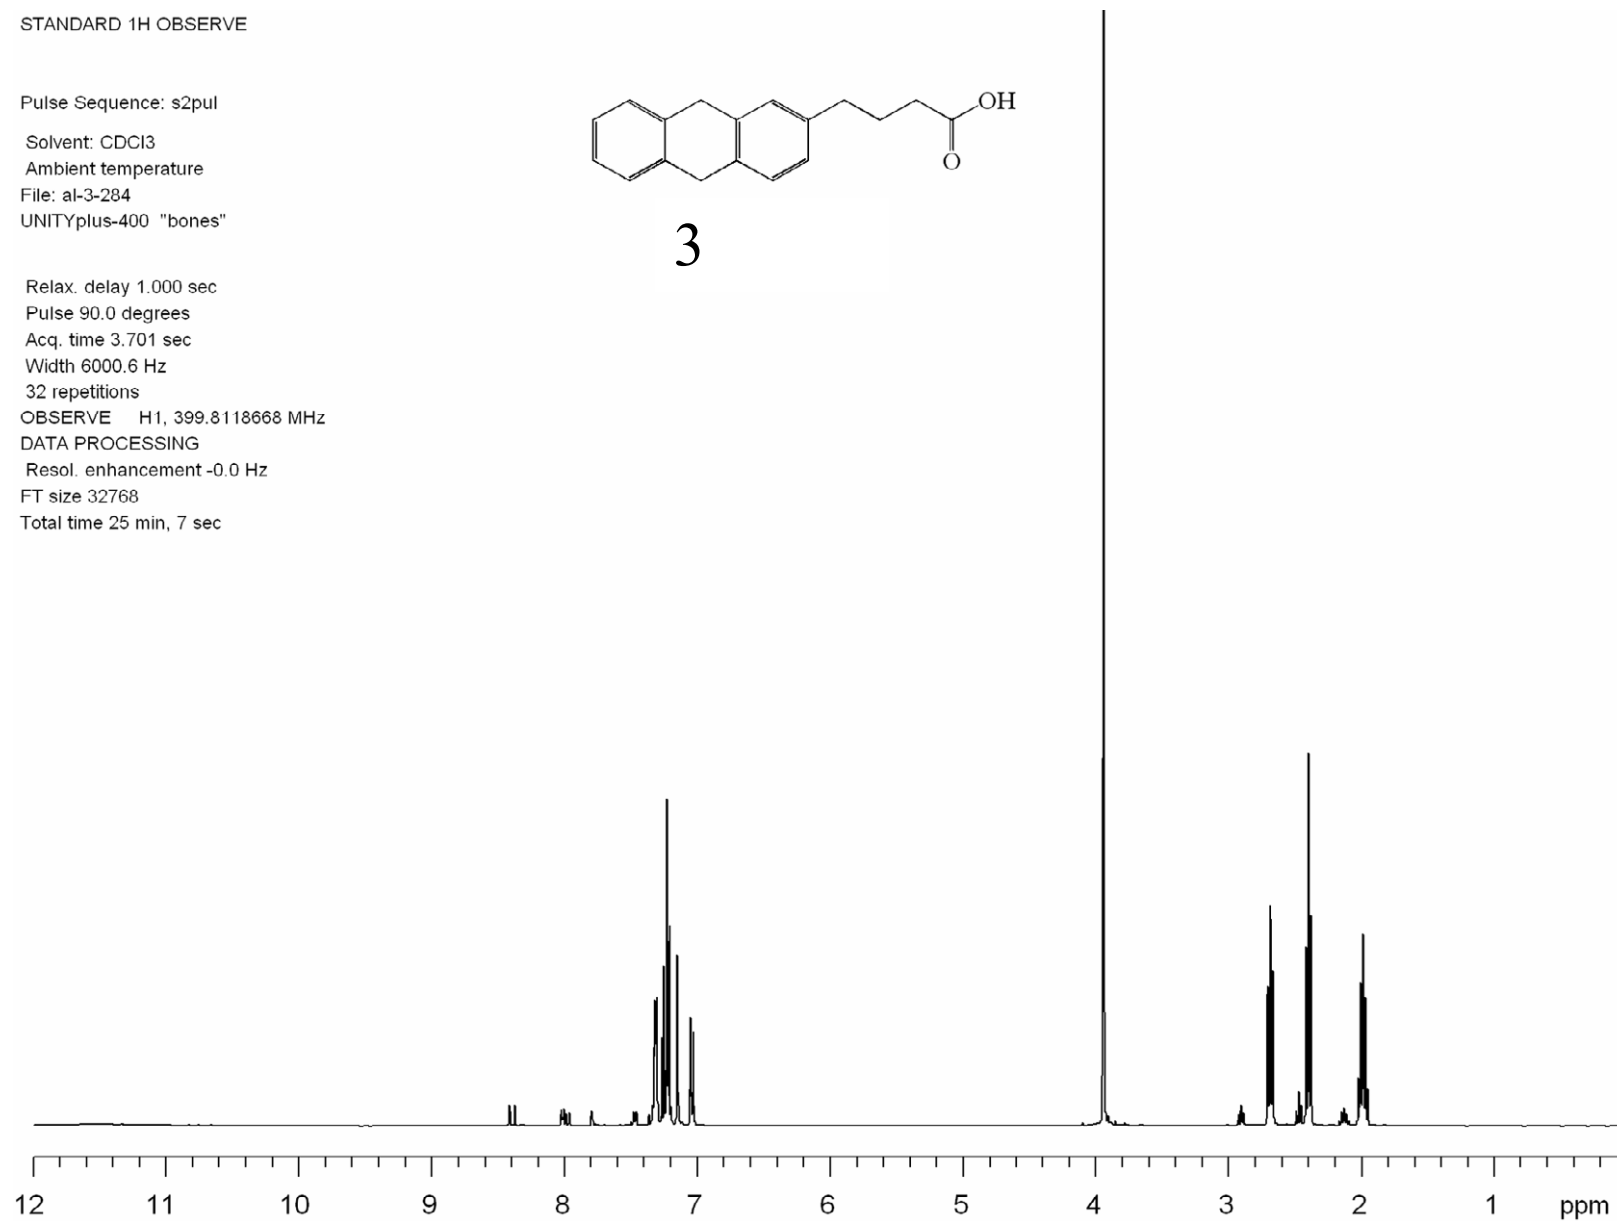

Electronic Supplementary Information for Dalton Transactions  
This journal is © The Royal Society of Chemistry 2007

STANDARD 1H OBSERVE

Pulse Sequence: s2pul

Solvent: CDCl<sub>3</sub>

Ambient temperature

File: al-3-286

UNITYplus-400 "bones"

Relax. delay 1.000 sec

Pulse 90.0 degrees

Acq. time 3.701 sec

Width 6000.6 Hz

60 repetitions

OBSERVE H1, 399.8118660 MHz

DATA PROCESSING

Resol. enhancement -0.0 Hz

FT size 32768

Total time 25 min, 7 sec

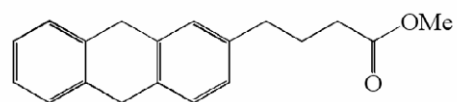

4

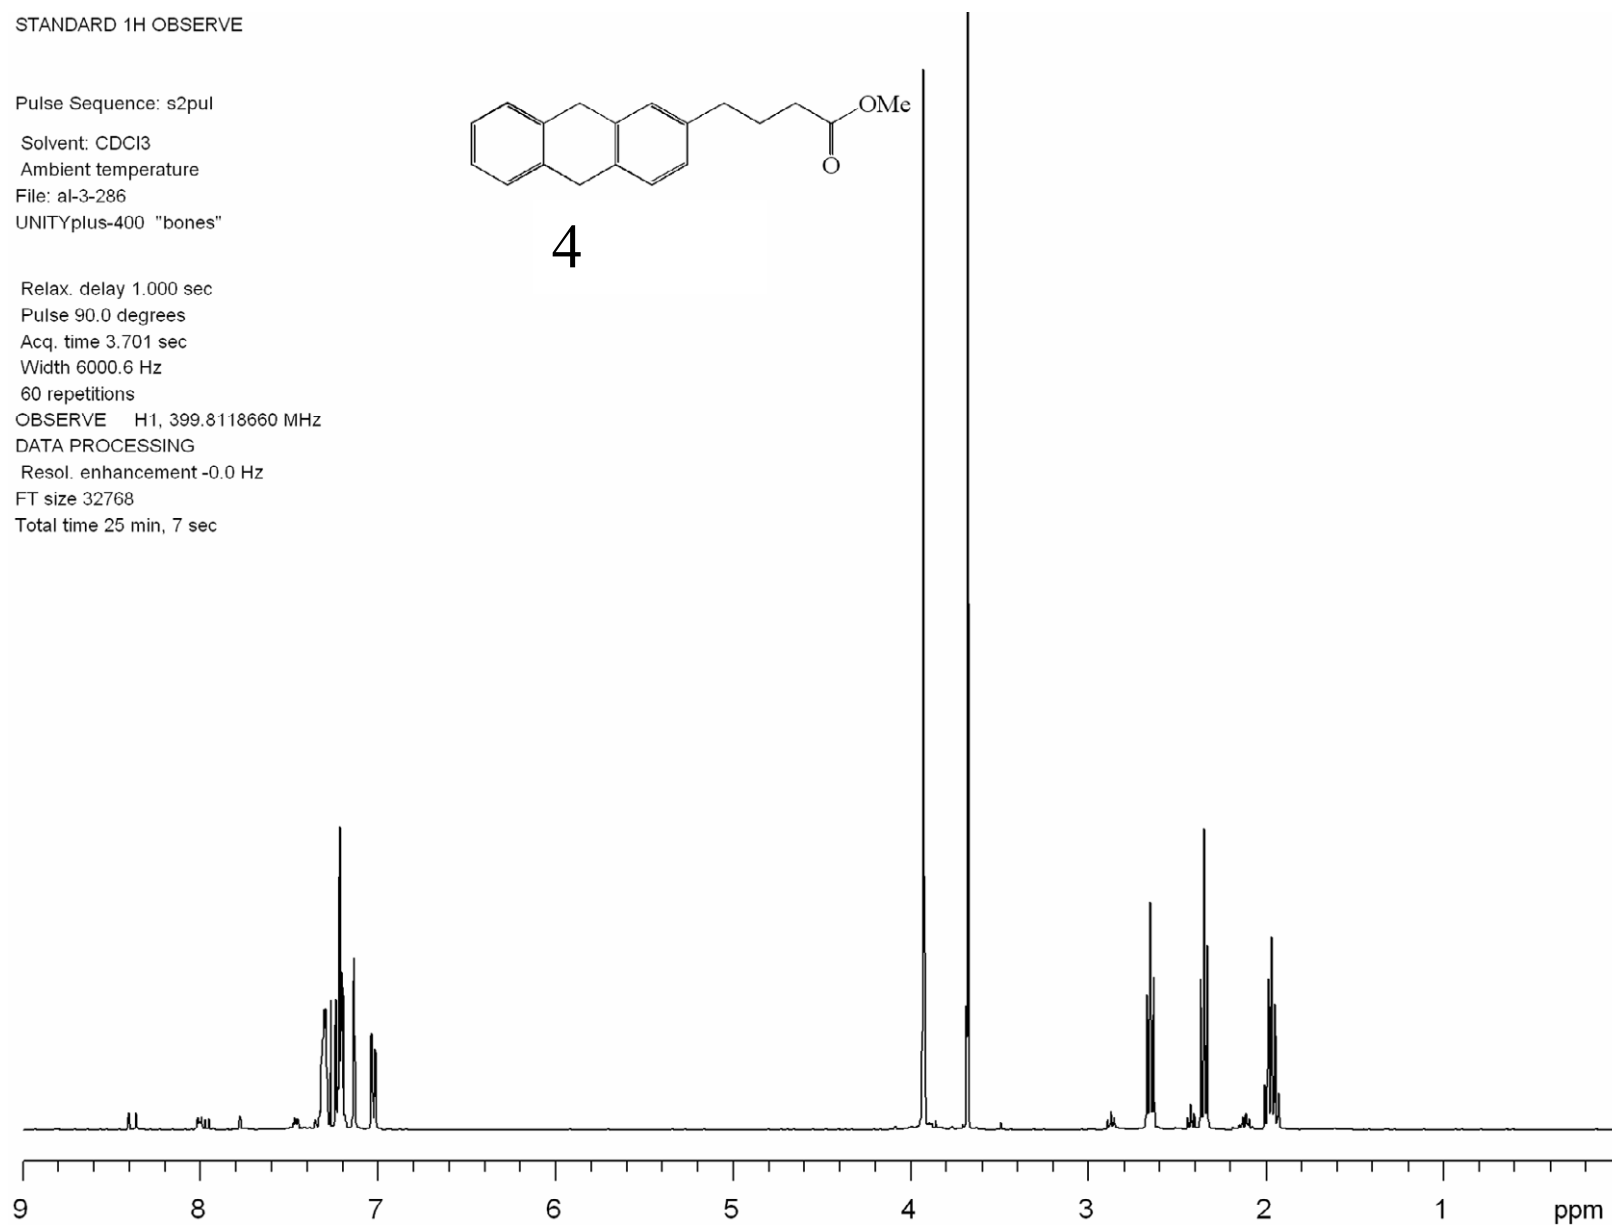

Electronic Supplementary Information for Dalton Transactions  
This journal is © The Royal Society of Chemistry 2007

STANDARD 1H OBSERVE

Pulse Sequence: s2pul

Solvent: CDCl3

Ambient temperature

File: al-3-288

UNITYplus-400 "bones"

Relax. delay 1.000 sec

Pulse 90.0 degrees

Acq. time 3.701 sec

Width 6000.6 Hz

28 repetitions

OBSERVE H1, 399.8118664 MHz

DATA PROCESSING

Resol. enhancement -0.0 Hz

FT size 32768

Total time 25 min, 7 sec

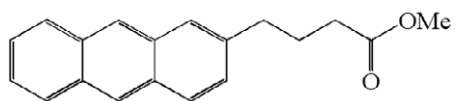

5

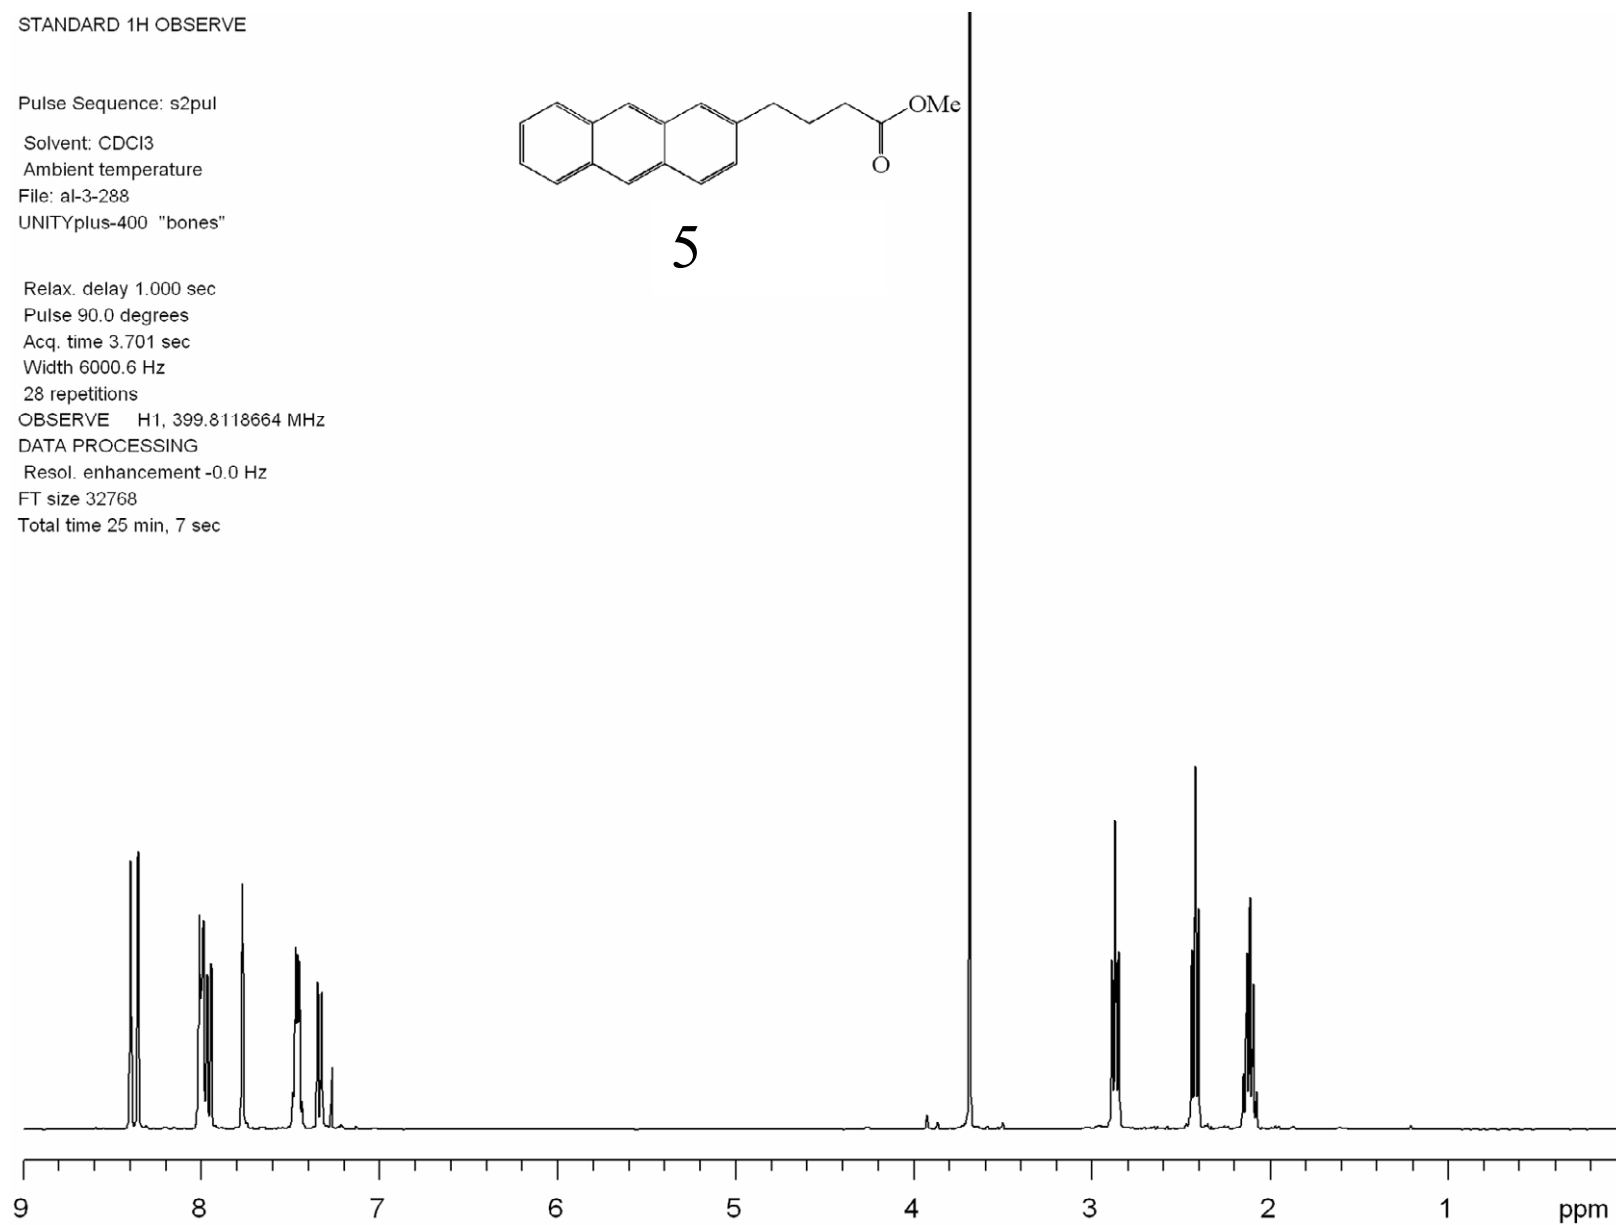

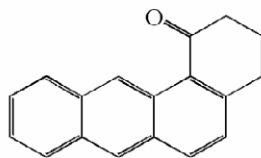

6

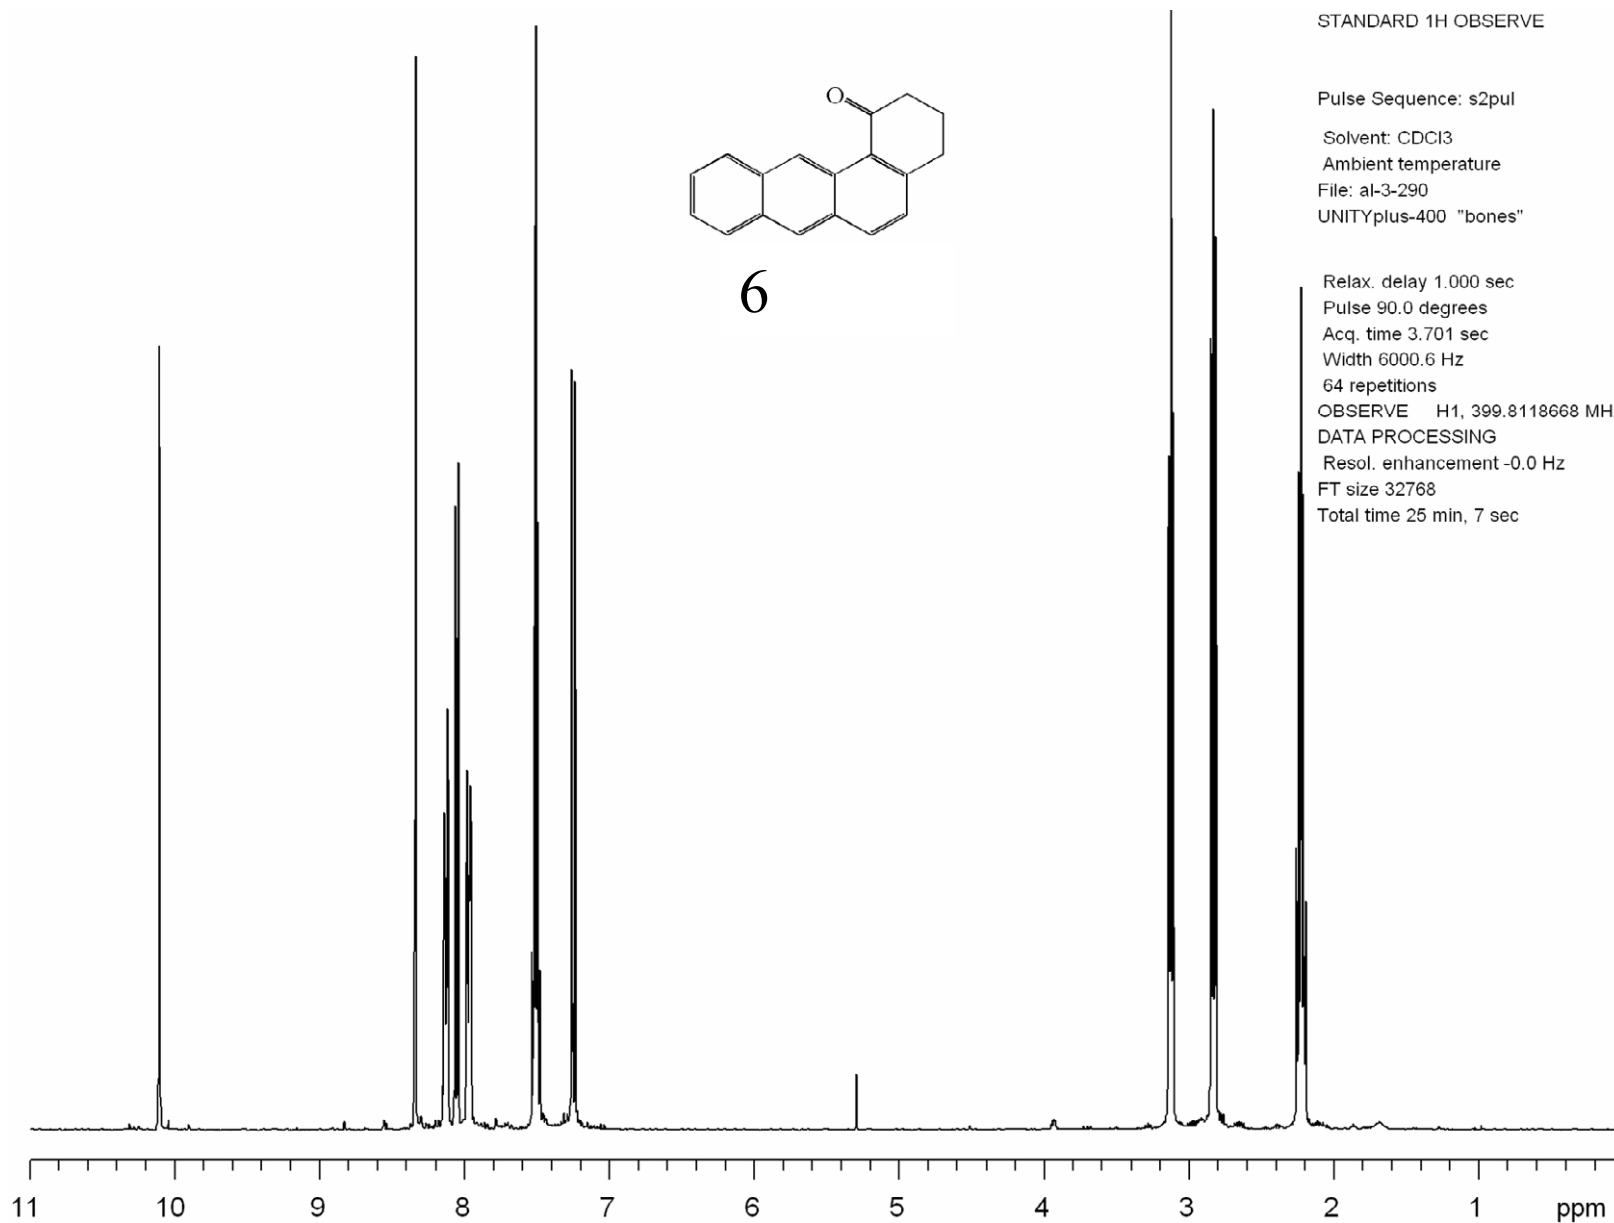

Electronic Supplementary Information for Dalton Transactions  
This journal is © The Royal Society of Chemistry 2007

STANDARD 1H OBSERVE

Pulse Sequence: s2pul

Solvent: CDCl<sub>3</sub>

Ambient temperature

File: al-4-12

UNITYplus-400 "bones"

Relax. delay 1.000 sec

Pulse 90.0 degrees

Acq. time 3.701 sec

Width 6759.0 Hz

24 repetitions

OBSERVE H1, 399.8118666 MHz

DATA PROCESSING

Resol. enhancement -0.0 Hz

FT size 32768

Total time 25 min, 7 sec

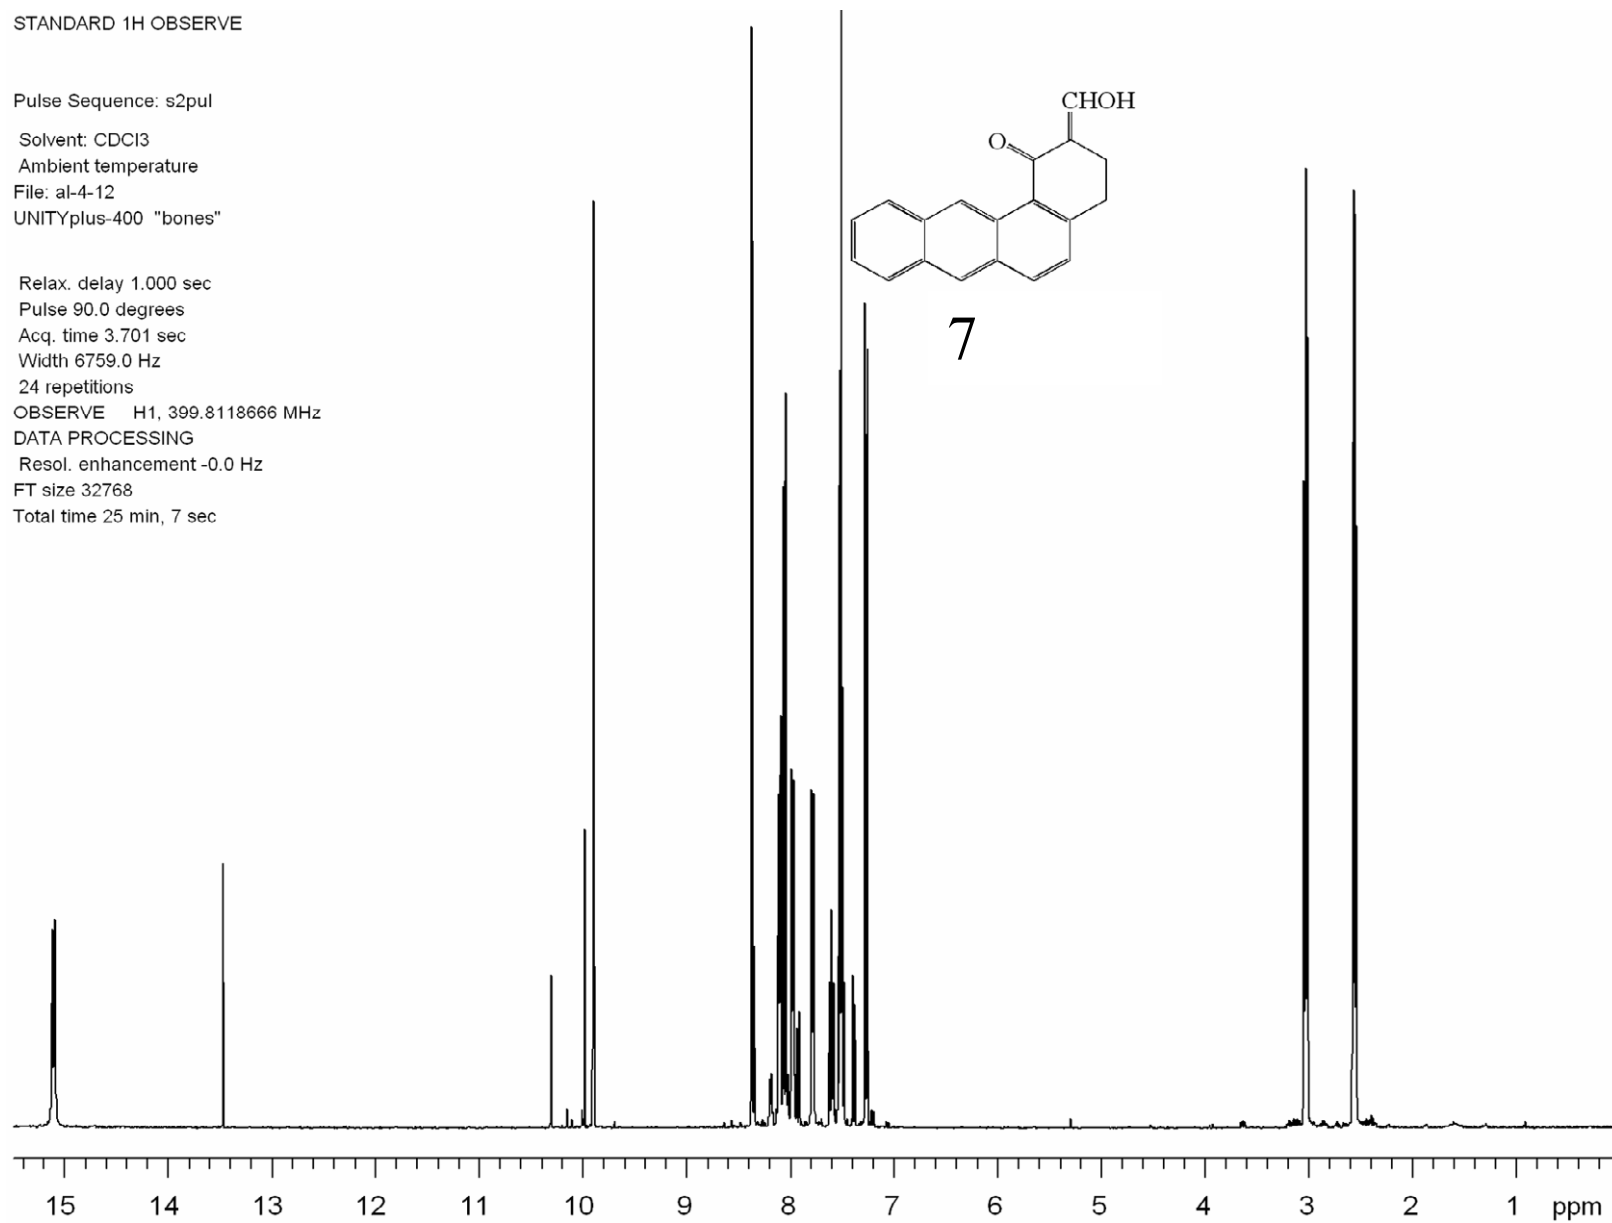

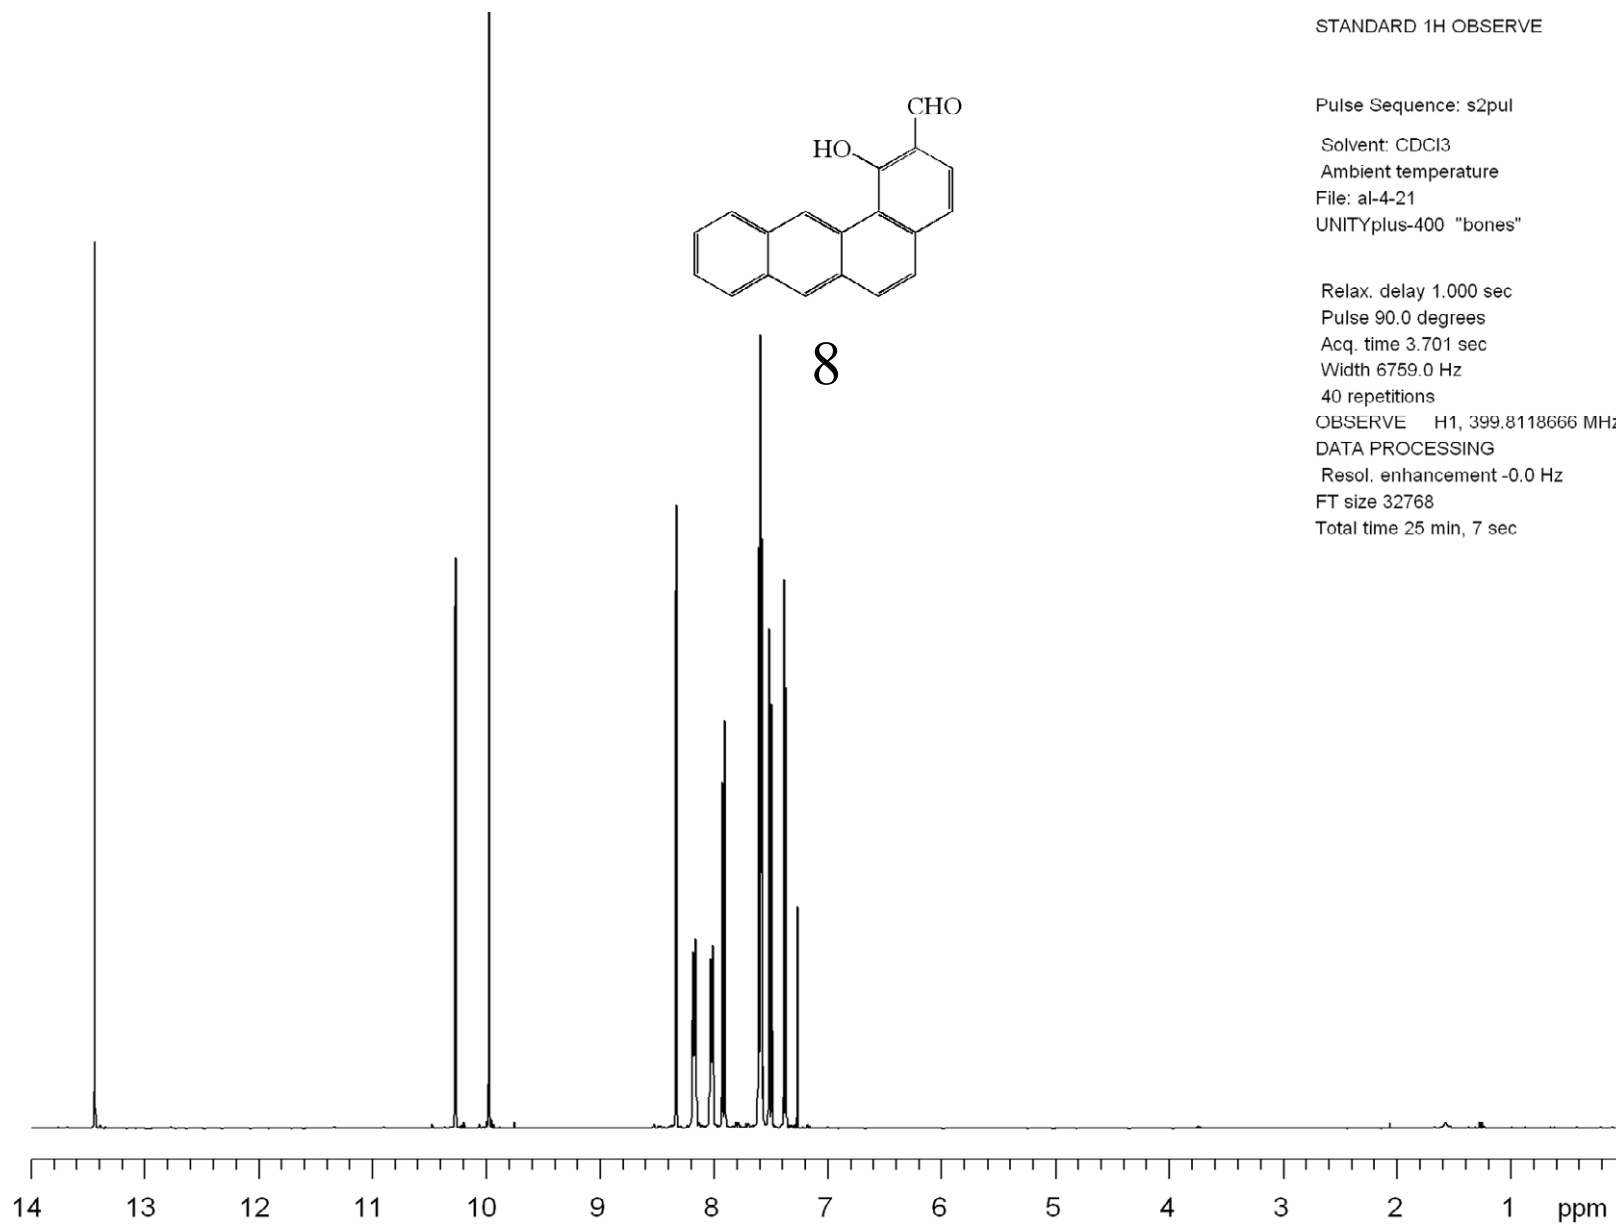



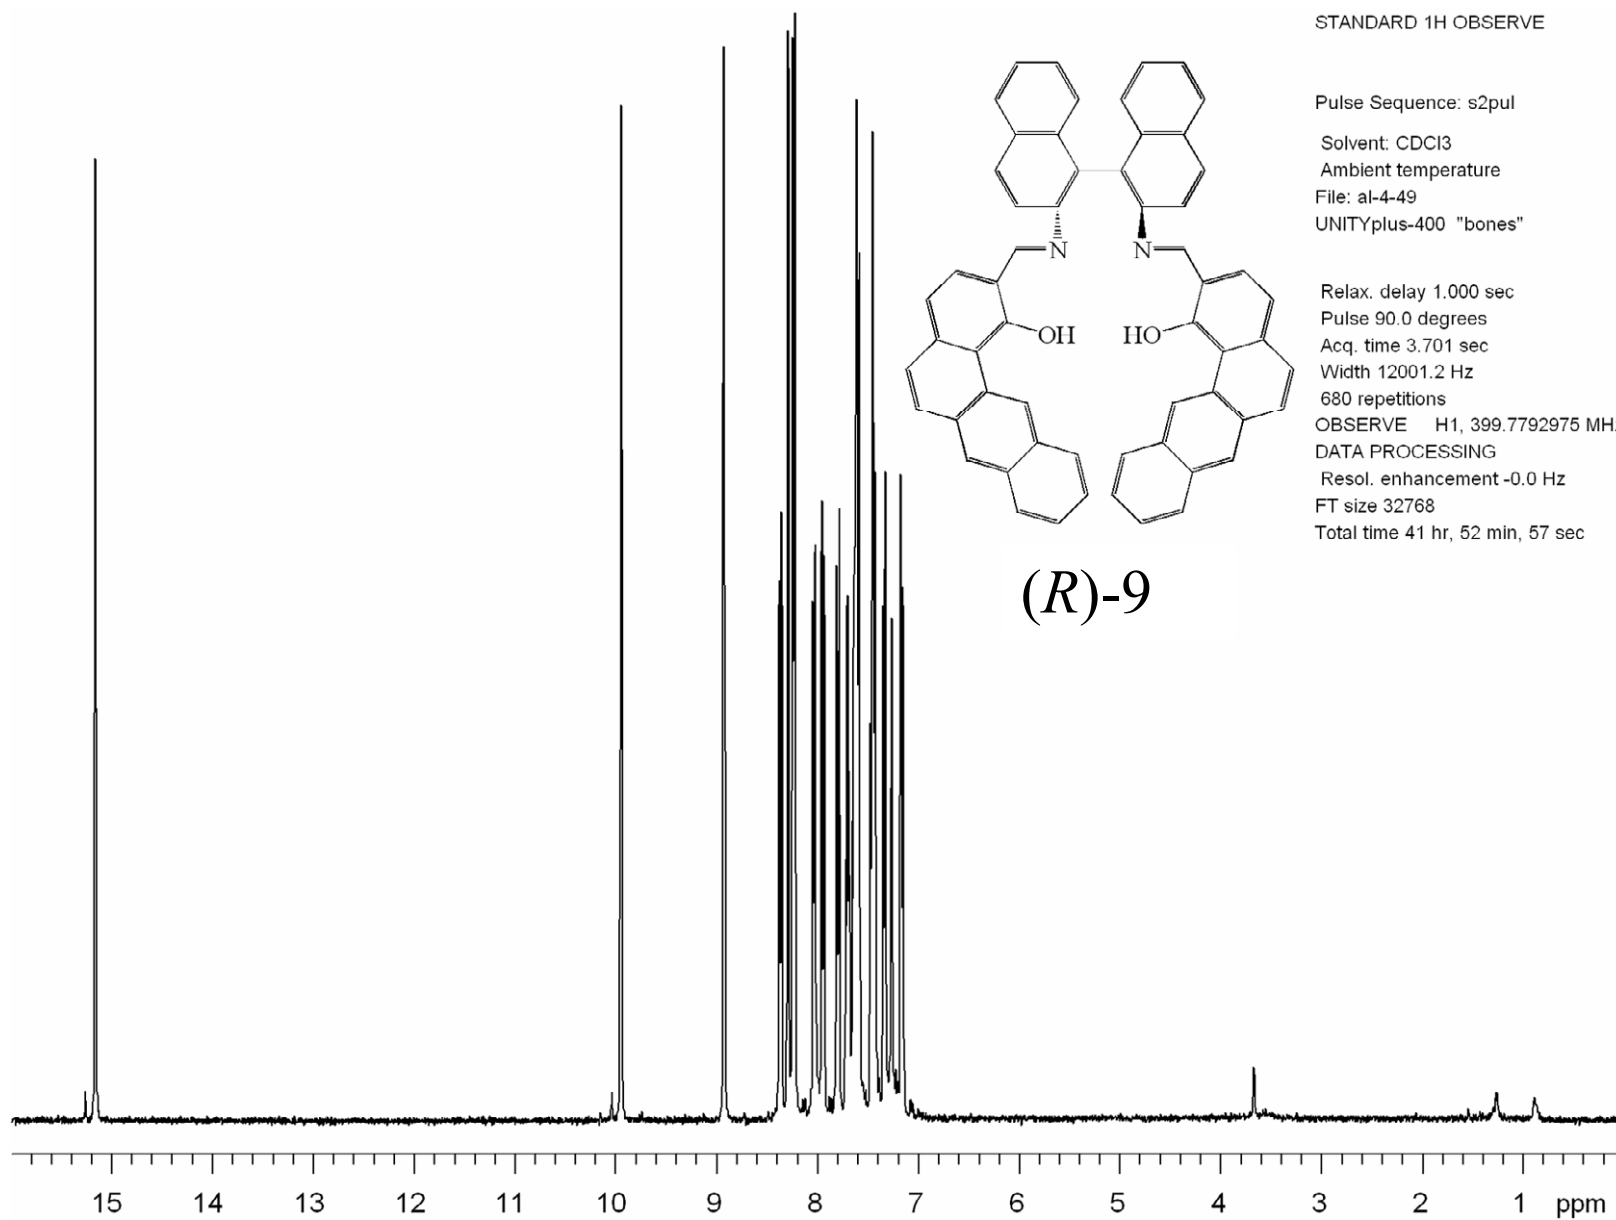

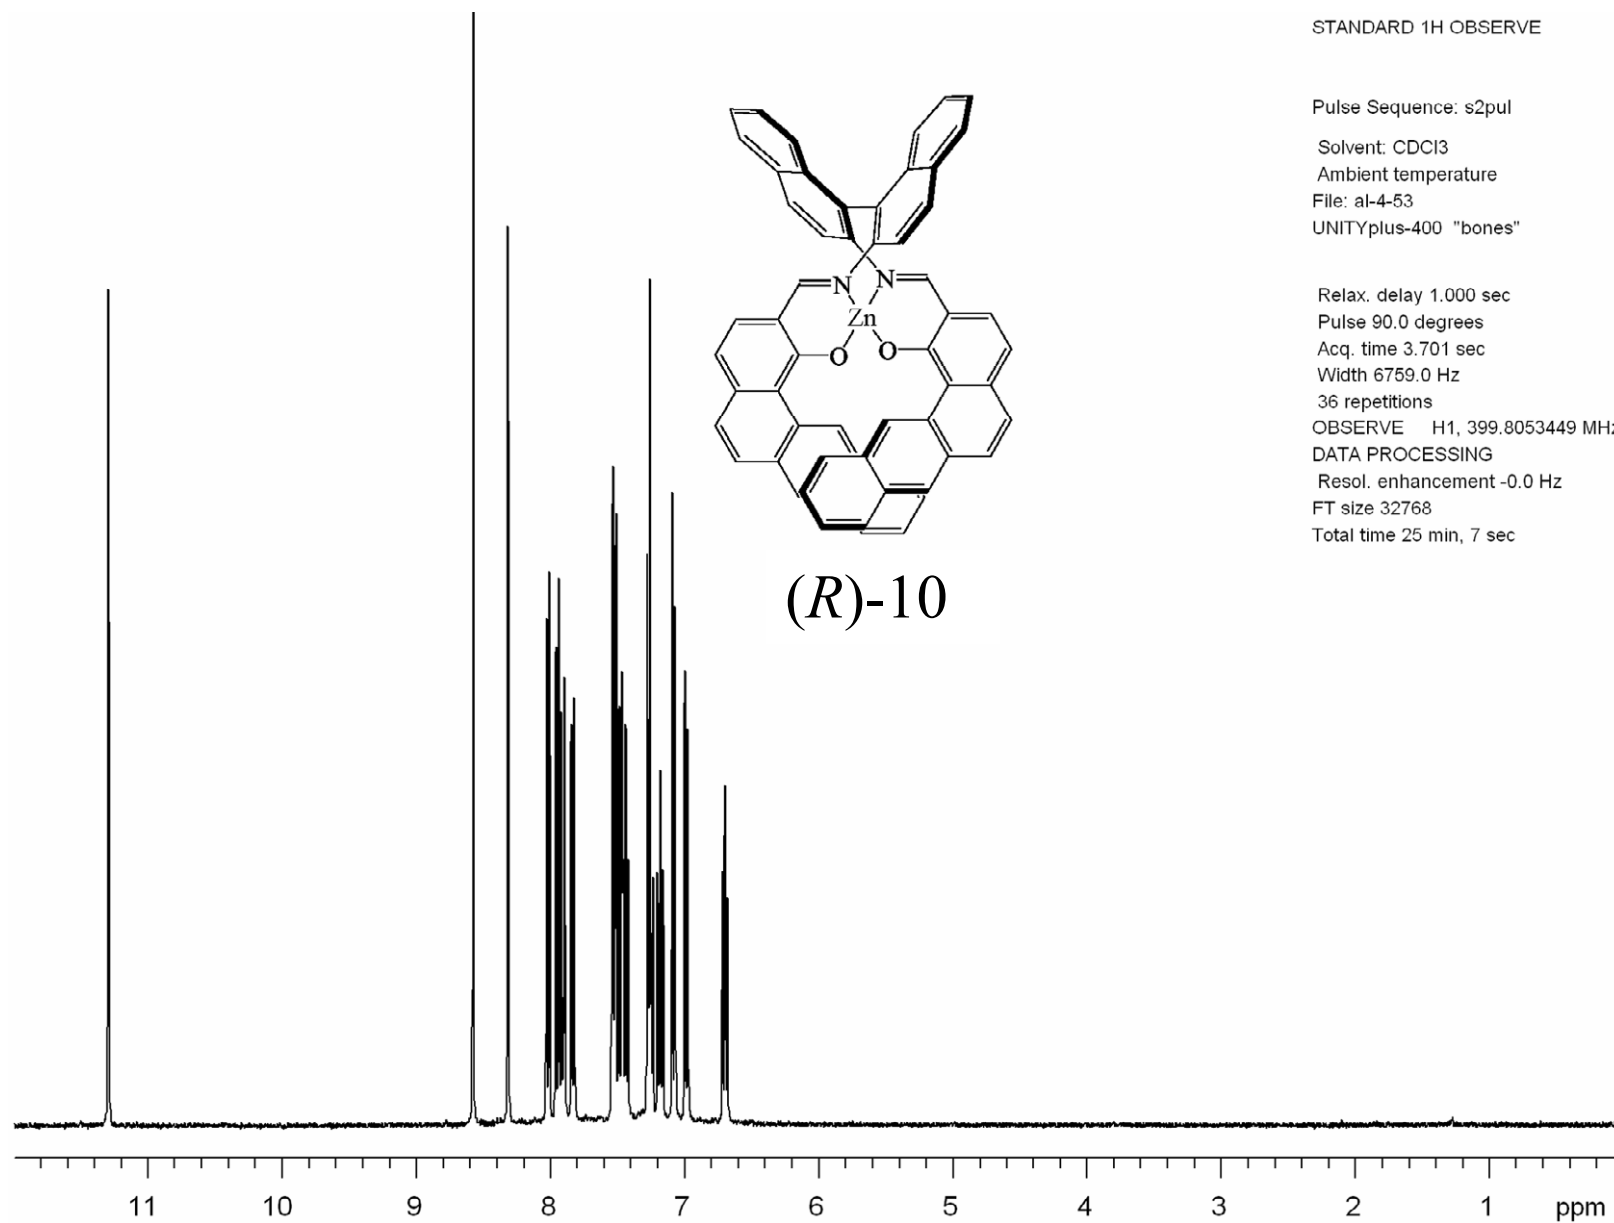

STANDARD 1H OBSERVE

Pulse Sequence: s2pul

Solvent: pyridine

Ambient temperature

File: al-4-110

UNITYplus-400 "bones"

Relax. delay 1.000 sec

Pulse 90.0 degrees

Acq. time 3.701 sec

Width 12001.2 Hz

52 repetitions

OBSERVE H1, 399.7792980 MHz

DATA PROCESSING

Resol. enhancement -0.0 Hz

FT size 32768

Total time 25 min, 7 sec

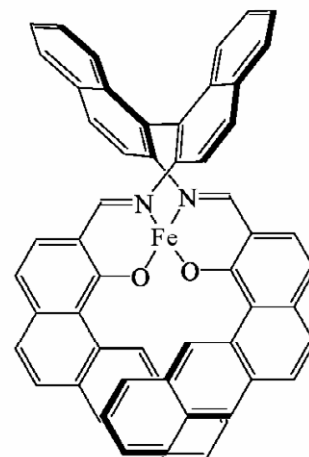

**(R)-11**

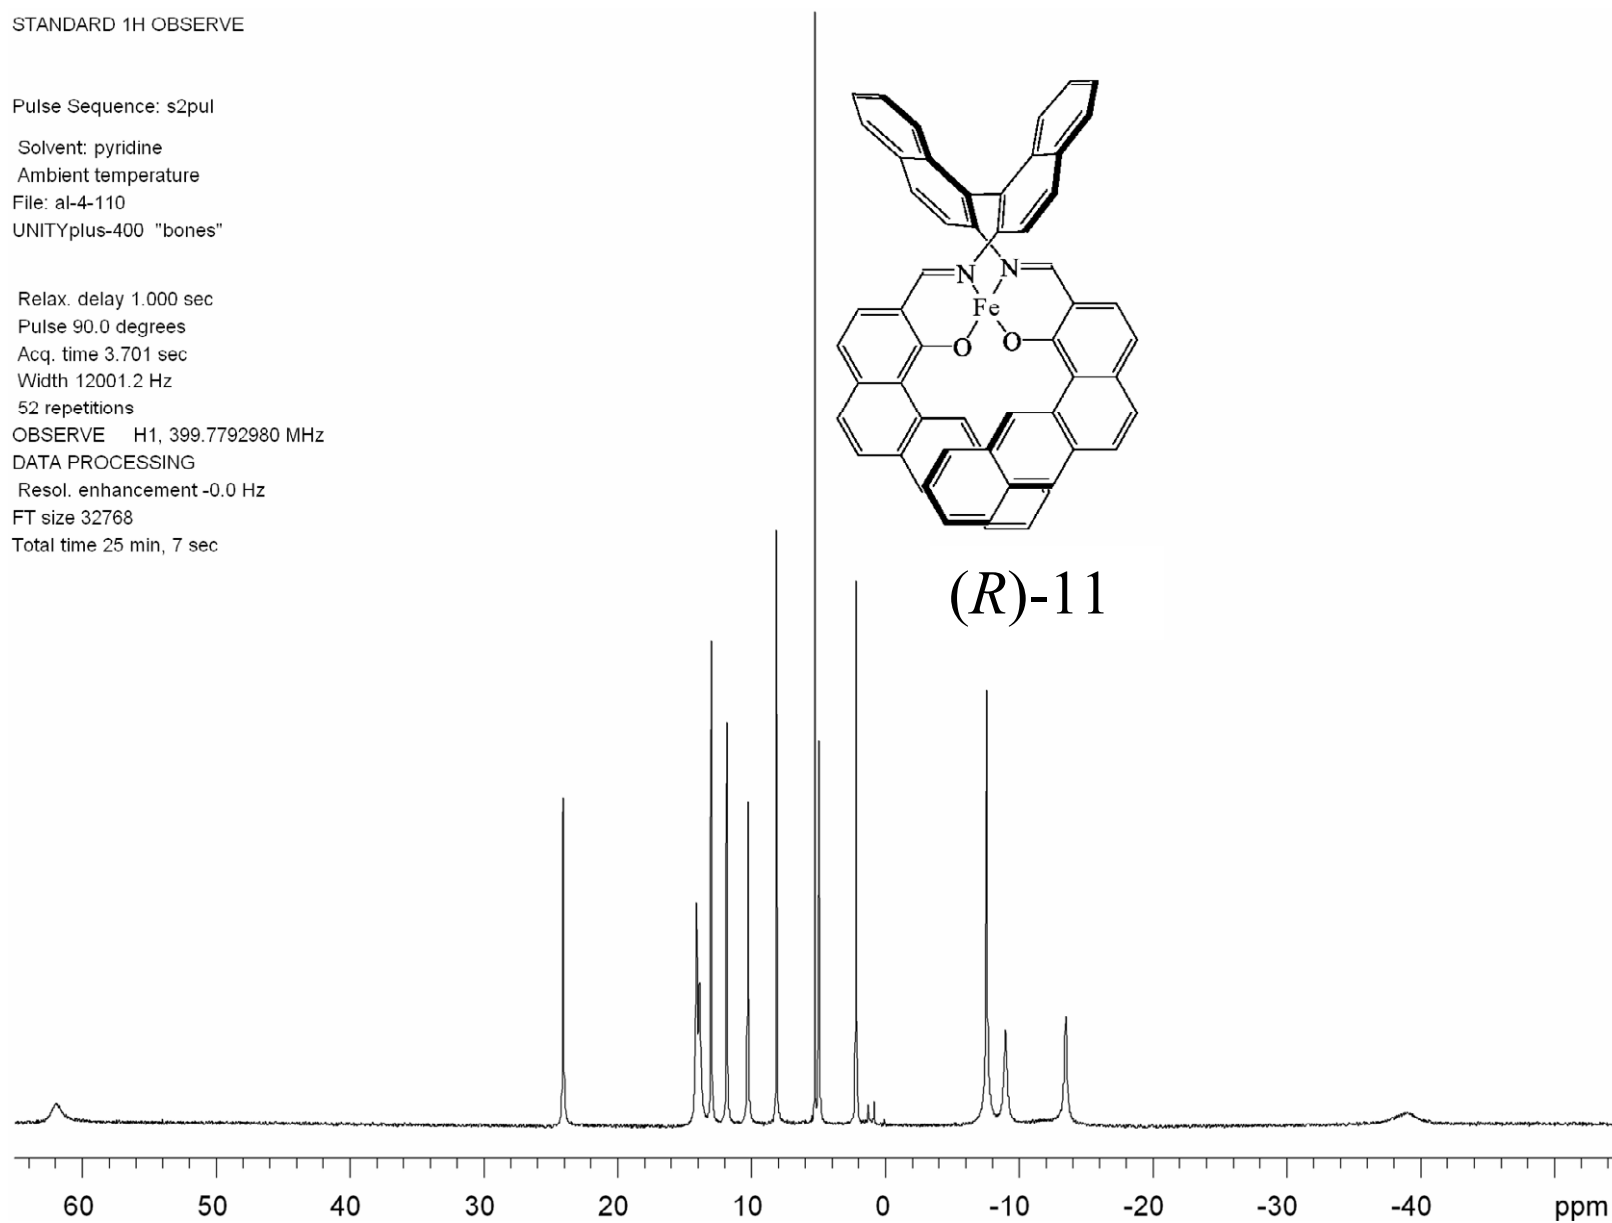

Electronic Supplementary Information for Dalton Transactions  
This journal is © The Royal Society of Chemistry 2007

13C OBSERVE

Pulse Sequence: s2pul

Solvent: CDCl<sub>3</sub>

Ambient temperature

File: al-3-232

UNITYplus-400 "bones"

Relax. delay 1.500 sec

Pulse 90.0 degrees

Acq. time 1.199 sec

Width 25000.0 Hz

1772 repetitions

OBSERVE C13, 100.5327548 MHz

DECOUPLE H1, 399.8138766 MHz

Power 45 dB

continuously on

WALTZ-16 modulated

DATA PROCESSING

Line broadening 1.0 Hz

FT size 65536

Total time 36 hr, 8 min, 10 sec

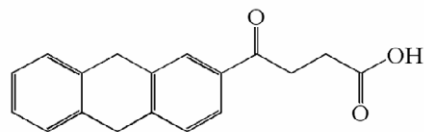

2

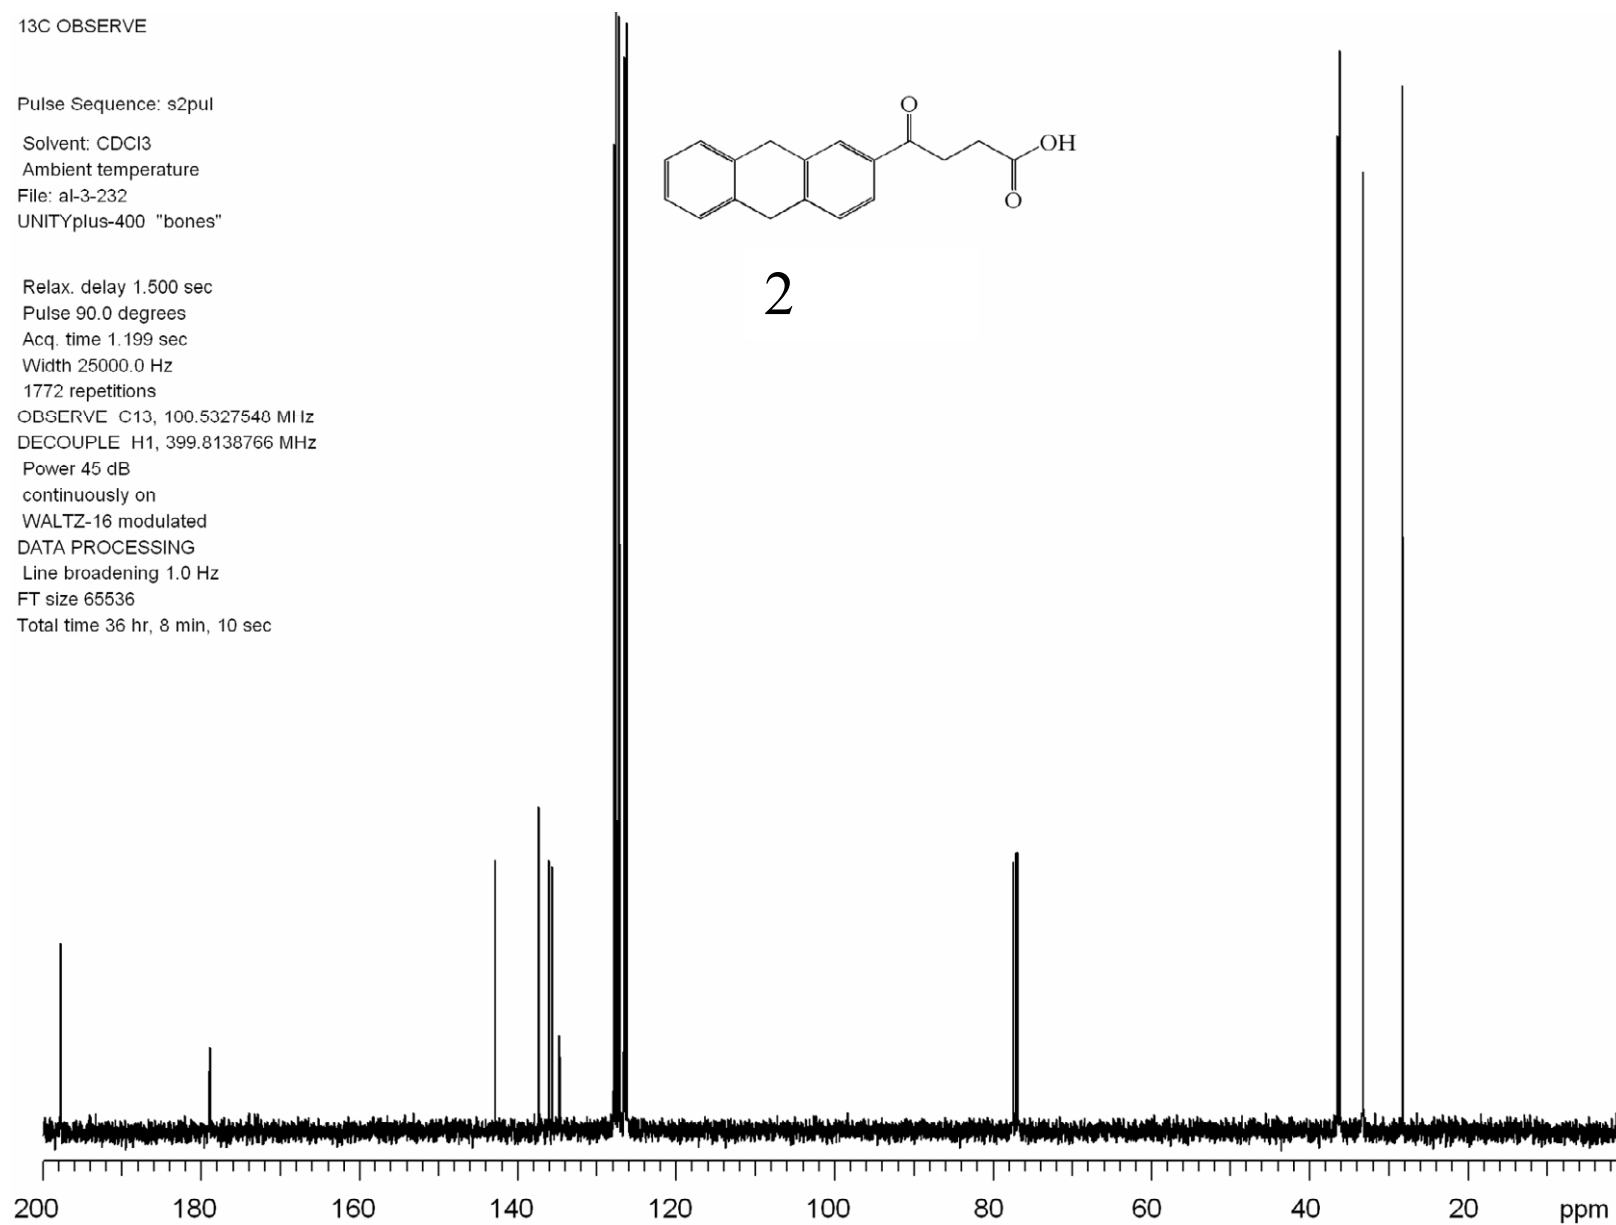

Electronic Supplementary Information for Dalton Transactions  
This journal is © The Royal Society of Chemistry 2007

<sup>13</sup>C OBSERVE

Pulse Sequence: s2pul

Solvent: CDCl<sub>3</sub>

Ambient temperature

File: al-3-284

UNITYplus-400 "bones"

Relax. delay 2.000 sec

Pulse 90.0 degrees

Acq. time 1.199 sec

Width 25000.0 Hz

13728 repetitions

OBSERVE C13, 100.5327540 MHz

DECOUPLE H1, 399.8138766 MHz

Power 45 dB

continuously on

WALTZ-16 modulated

DATA PROCESSING

Line broadening 1.0 Hz

FT size 65536

Total time 42 hr, 48 min, 10 sec

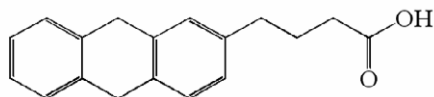

3

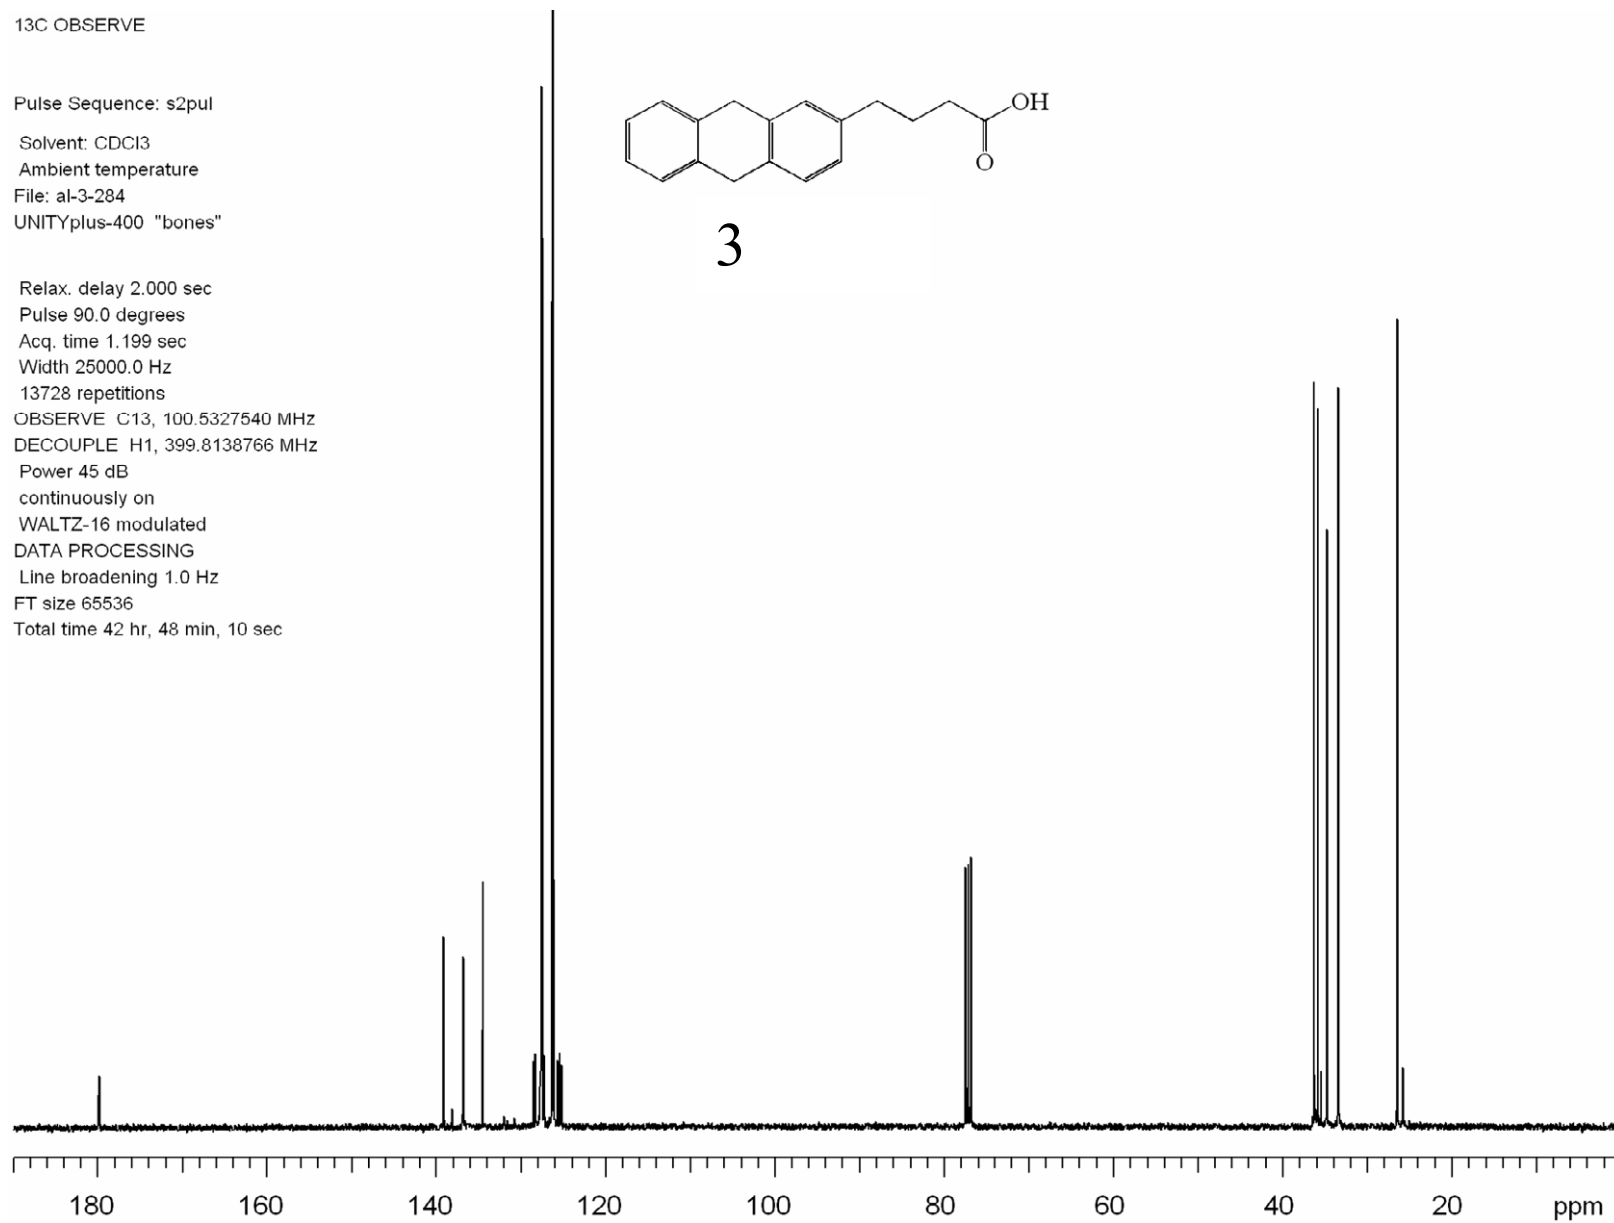

Electronic Supplementary Information for Dalton Transactions  
This journal is © The Royal Society of Chemistry 2007

13C OBSERVE

Pulse Sequence: s2pul

Solvent: CDCl<sub>3</sub>

Ambient temperature

File: al-3-286

UNITYplus-400 "bones"

Relax. delay 2.000 sec

Pulse 90.0 degrees

Acq. time 1.199 sec

Width 25000.0 Hz

13344 repetitions

OBSERVE C13, 100.5327525 MHz

DECOUPLE H1, 399.8138766 MHz

Power 45 dB

continuously on

WALTZ-16 modulated

DATA PROCESSING

Line broadening 1.0 Hz

FT size 65536

Total time 42 hr, 48 min, 10 sec

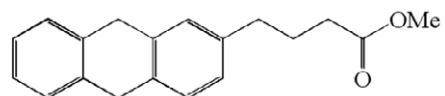

4

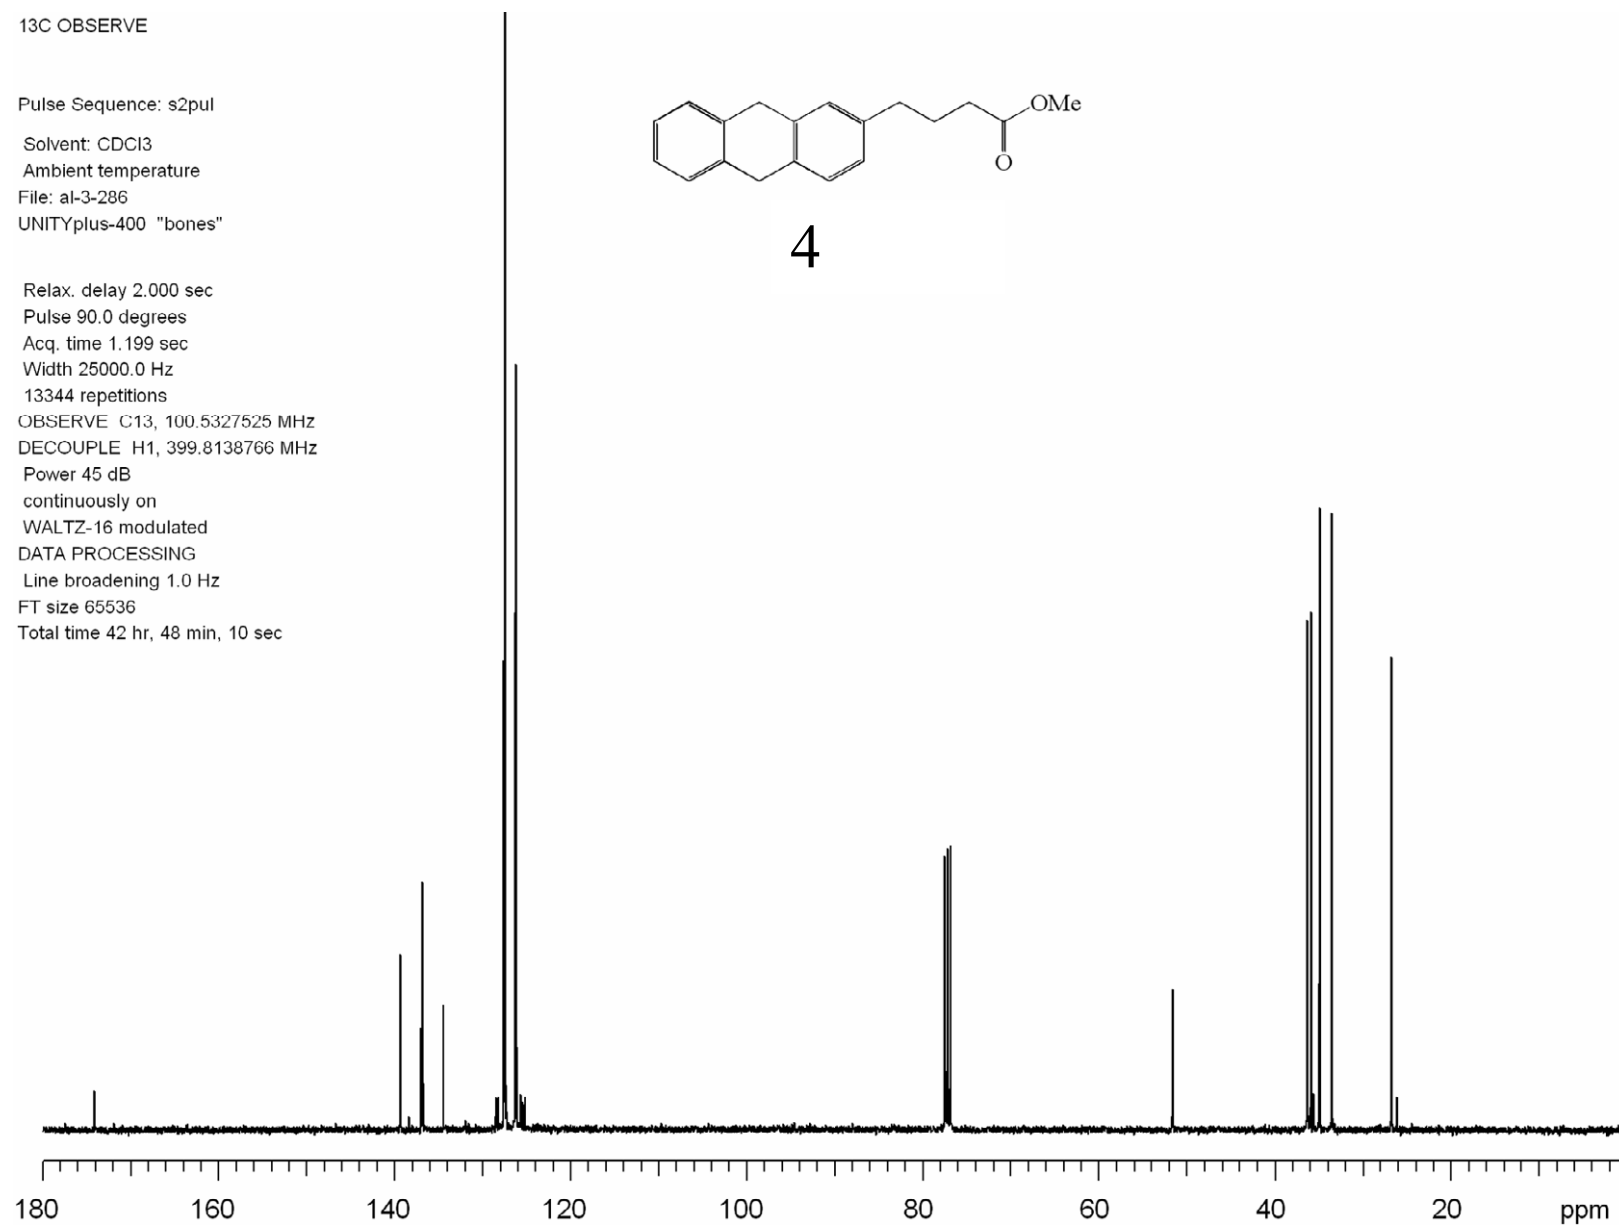

Electronic Supplementary Information for Dalton Transactions  
This journal is © The Royal Society of Chemistry 2007

<sup>13</sup>C OBSERVE

Pulse Sequence: s2pul

Solvent: CDCl<sub>3</sub>

Ambient temperature

File: al-3-288

UNITYplus-400 "bones"

Relax. delay 2.000 sec

Pulse 90.0 degrees

Acq. time 1.199 sec

Width 25000.0 Hz

5728 repetitions

OBSERVE C13, 100.5327532 MHz

DECOUPLE H1, 399.8138766 MHz

Power 45 dB

continuously on

WALTZ-16 modulated

DATA PROCESSING

Line broadening 1.0 Hz

FT size 65536

Total time 42 hr, 48 min, 10 sec

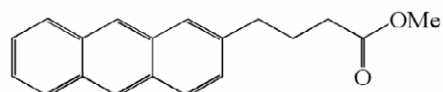

5

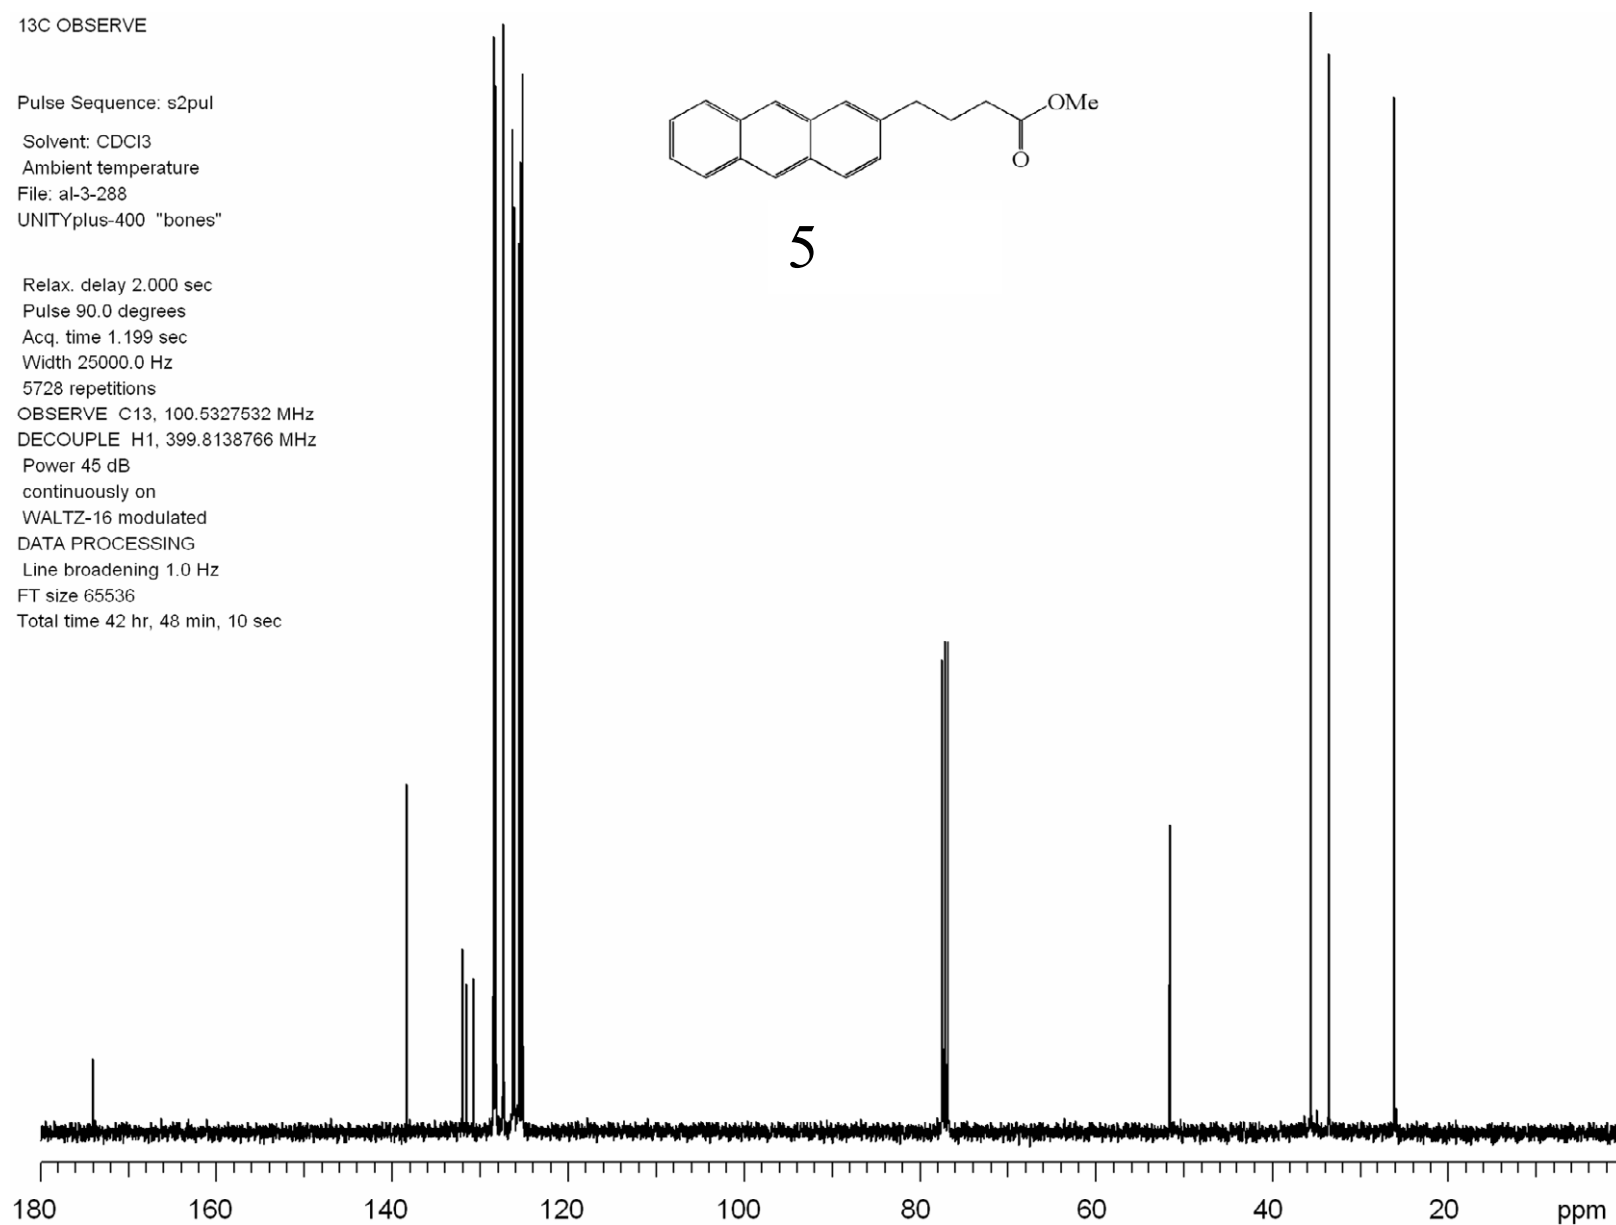

Electronic Supplementary Information for Dalton Transactions  
This journal is © The Royal Society of Chemistry 2007

<sup>13</sup>C OBSERVE

Pulse Sequence: s2pul

Solvent: CDCl<sub>3</sub>

Ambient temperature

File: al-3-290

UNITYplus-400 "bones"

Relax. delay 2.000 sec

Pulse 90.0 degrees

Acq. time 1.199 sec

Width 25000.0 Hz

12256 repetitions

OBSERVE C13, 100.5327540 MHz

DECOUPLE H1, 399.8138766 MHz

Power 45 dB

continuously on

WALTZ-16 modulated

DATA PROCESSING

Line broadening 1.0 Hz

FT size 65536

Total time 42 hr, 48 min, 10 sec

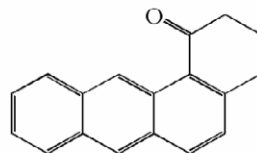

71

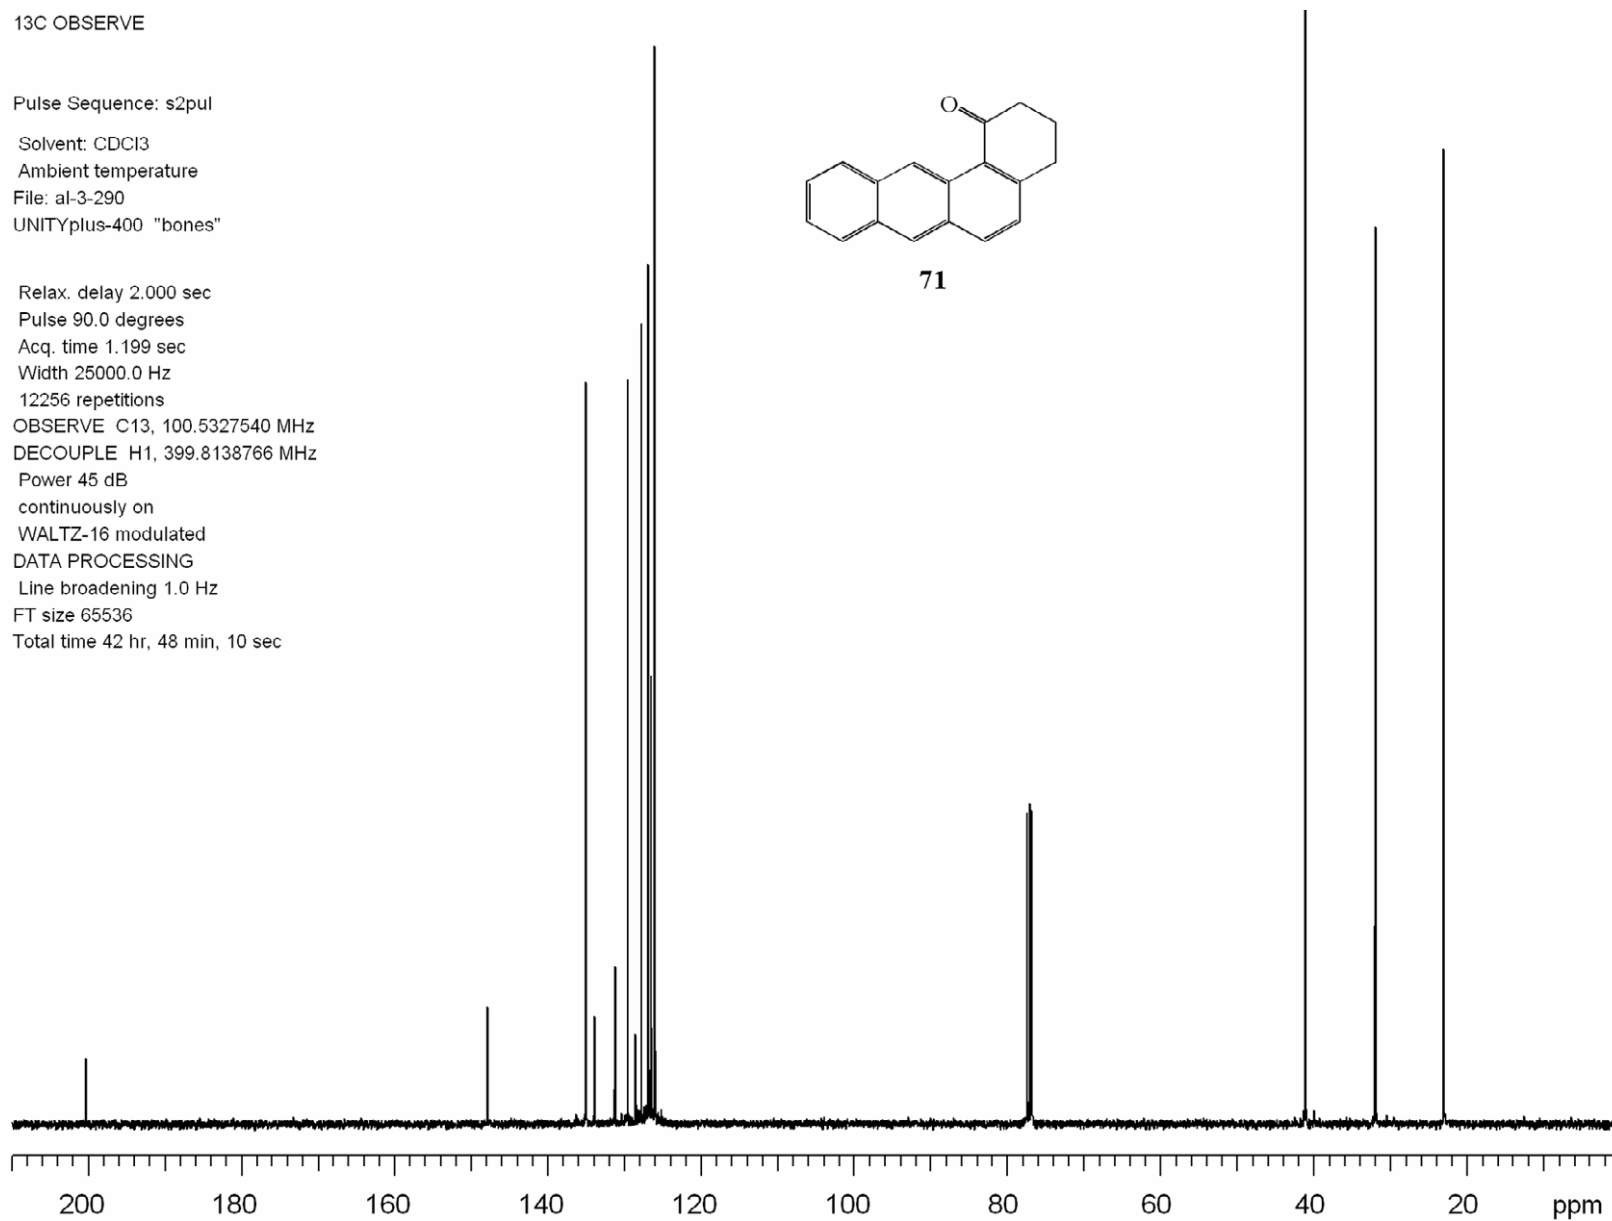



Electronic Supplementary Information for Dalton Transactions  
This journal is © The Royal Society of Chemistry 2007

<sup>13</sup>C OBSERVE

Pulse Sequence: s2pul

Solvent: CDCl<sub>3</sub>

Ambient temperature

File: al-4-12

UNITYplus-400 "bones"

Relax. delay 2.000 sec

Pulse 90.0 degrees

Acq. time 1.199 sec

Width 25000.0 Hz

16336 repetitions

OBSERVE C13, 100.5327555 MHz

DECOUPLE H1, 399.8138766 MHz

Power 45 dB

continuously on

WALTZ-16 modulated

DATA PROCESSING

Line broadening 1.0 Hz

FT size 65536

Total time 42 hr, 48 min, 10 sec

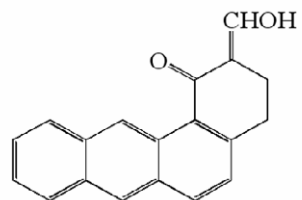

7

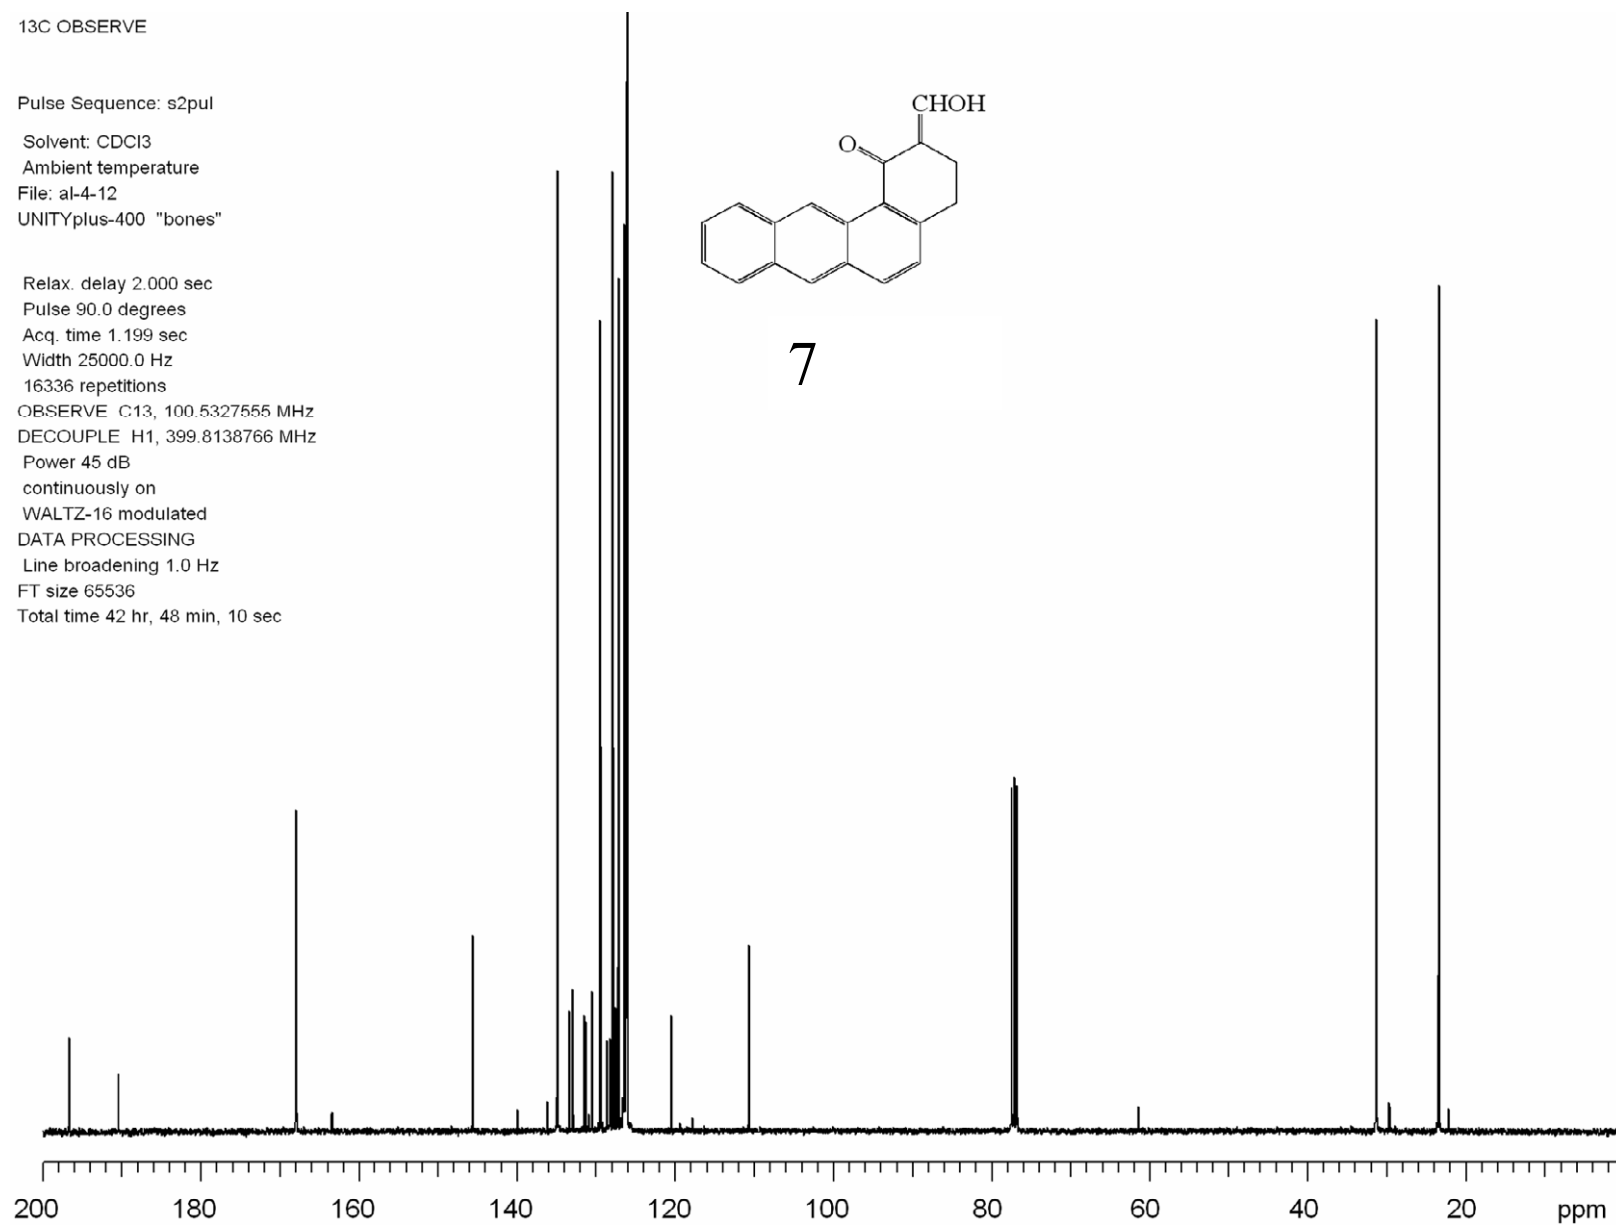

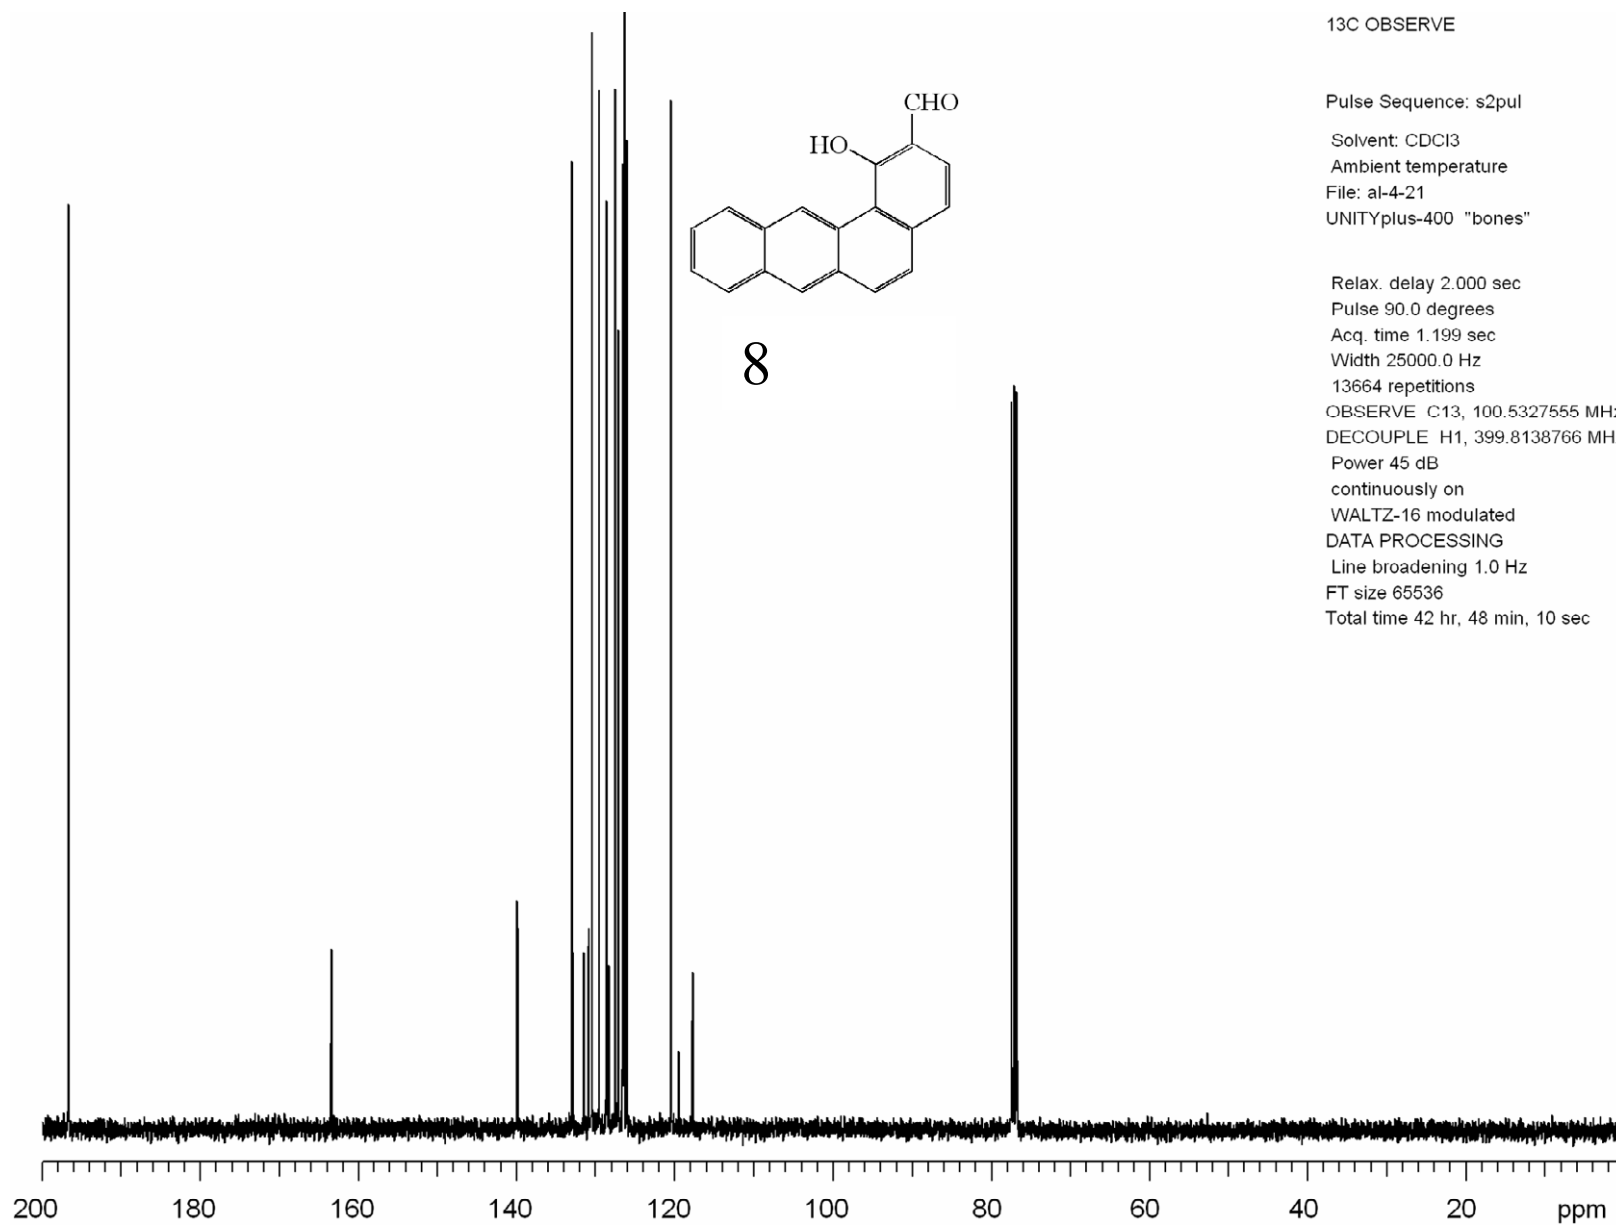

<sup>13</sup>C OBSERVE

Pulse Sequence: s2pul

Solvent: CDCl<sub>3</sub>

Ambient temperature

File: al-4-21

UNITYplus-400 "bones"

Relax. delay 2.000 sec

Pulse 90.0 degrees

Acq. time 1.199 sec

Width 25000.0 Hz

13664 repetitions

OBSERVE C-13, 100.5327555 MHz

DECOUPLE H-1, 399.8138766 MHz

Power 45 dB

continuously on

WALTZ-16 modulated

DATA PROCESSING

Line broadening 1.0 Hz

FT size 65536

Total time 42 hr, 48 min, 10 sec

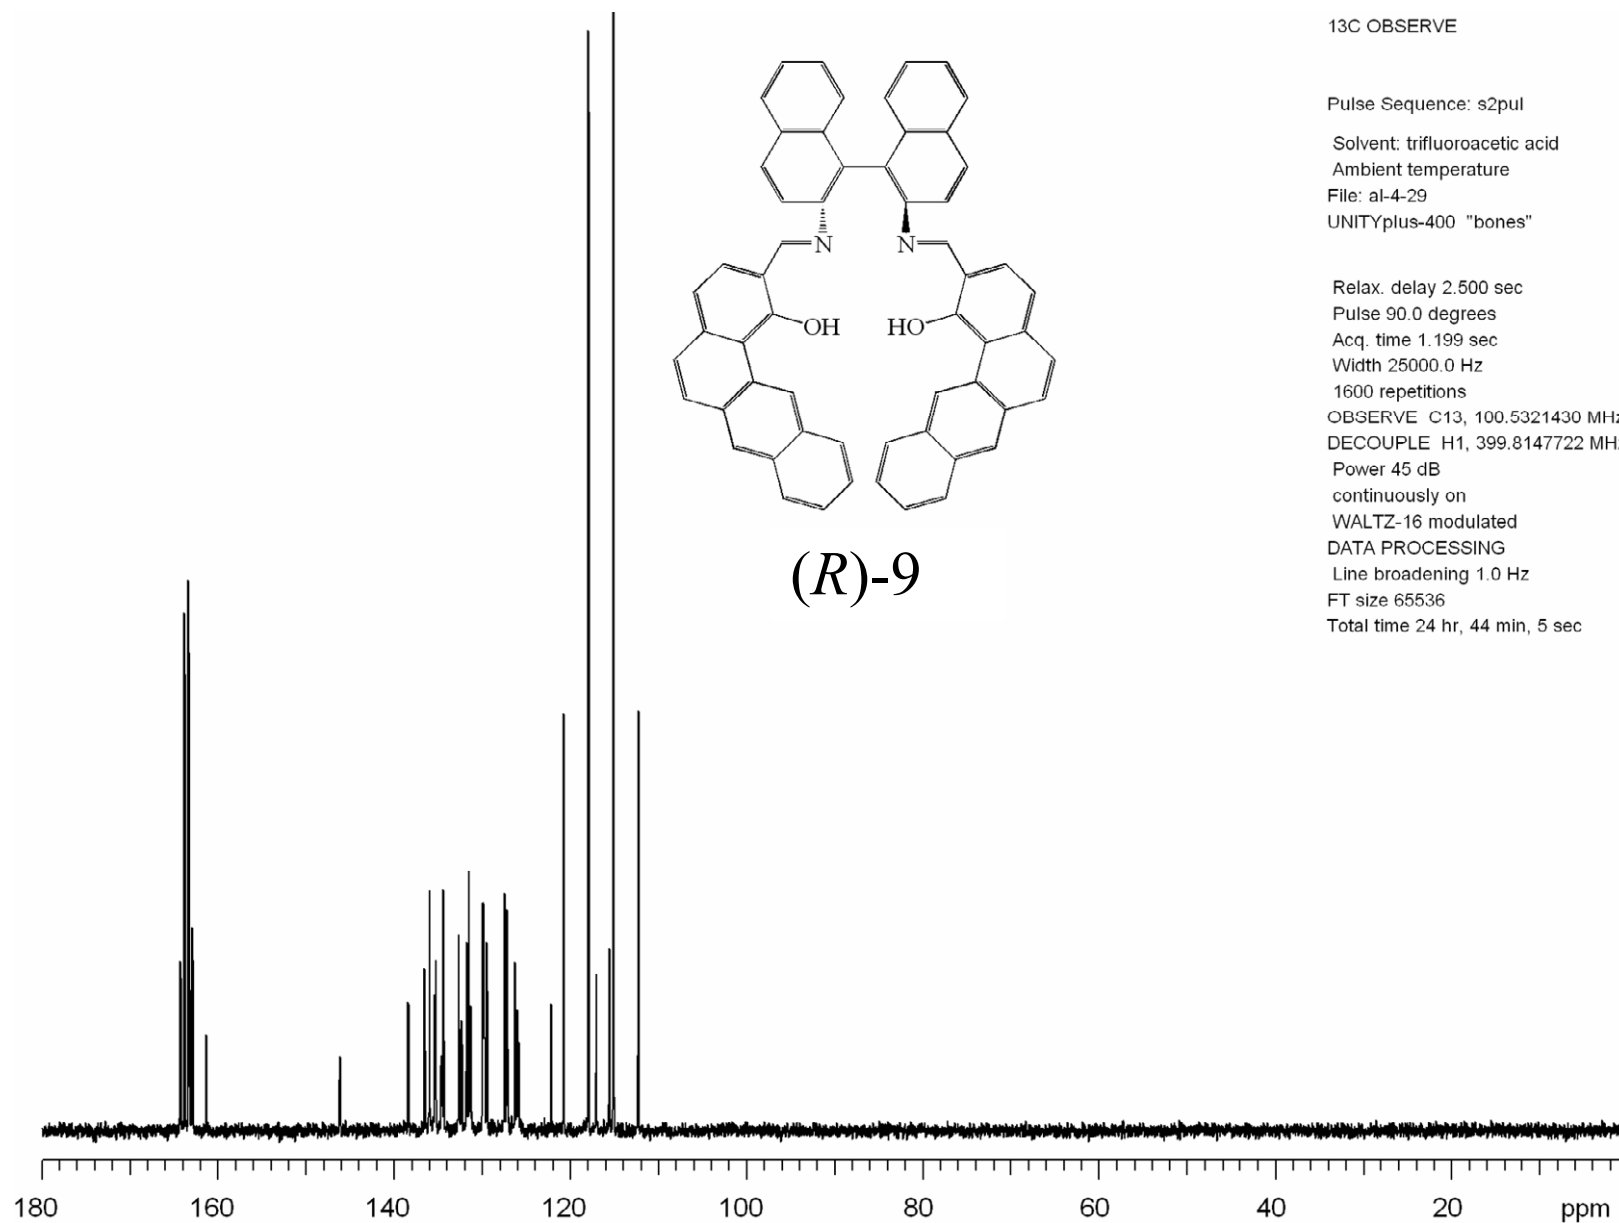

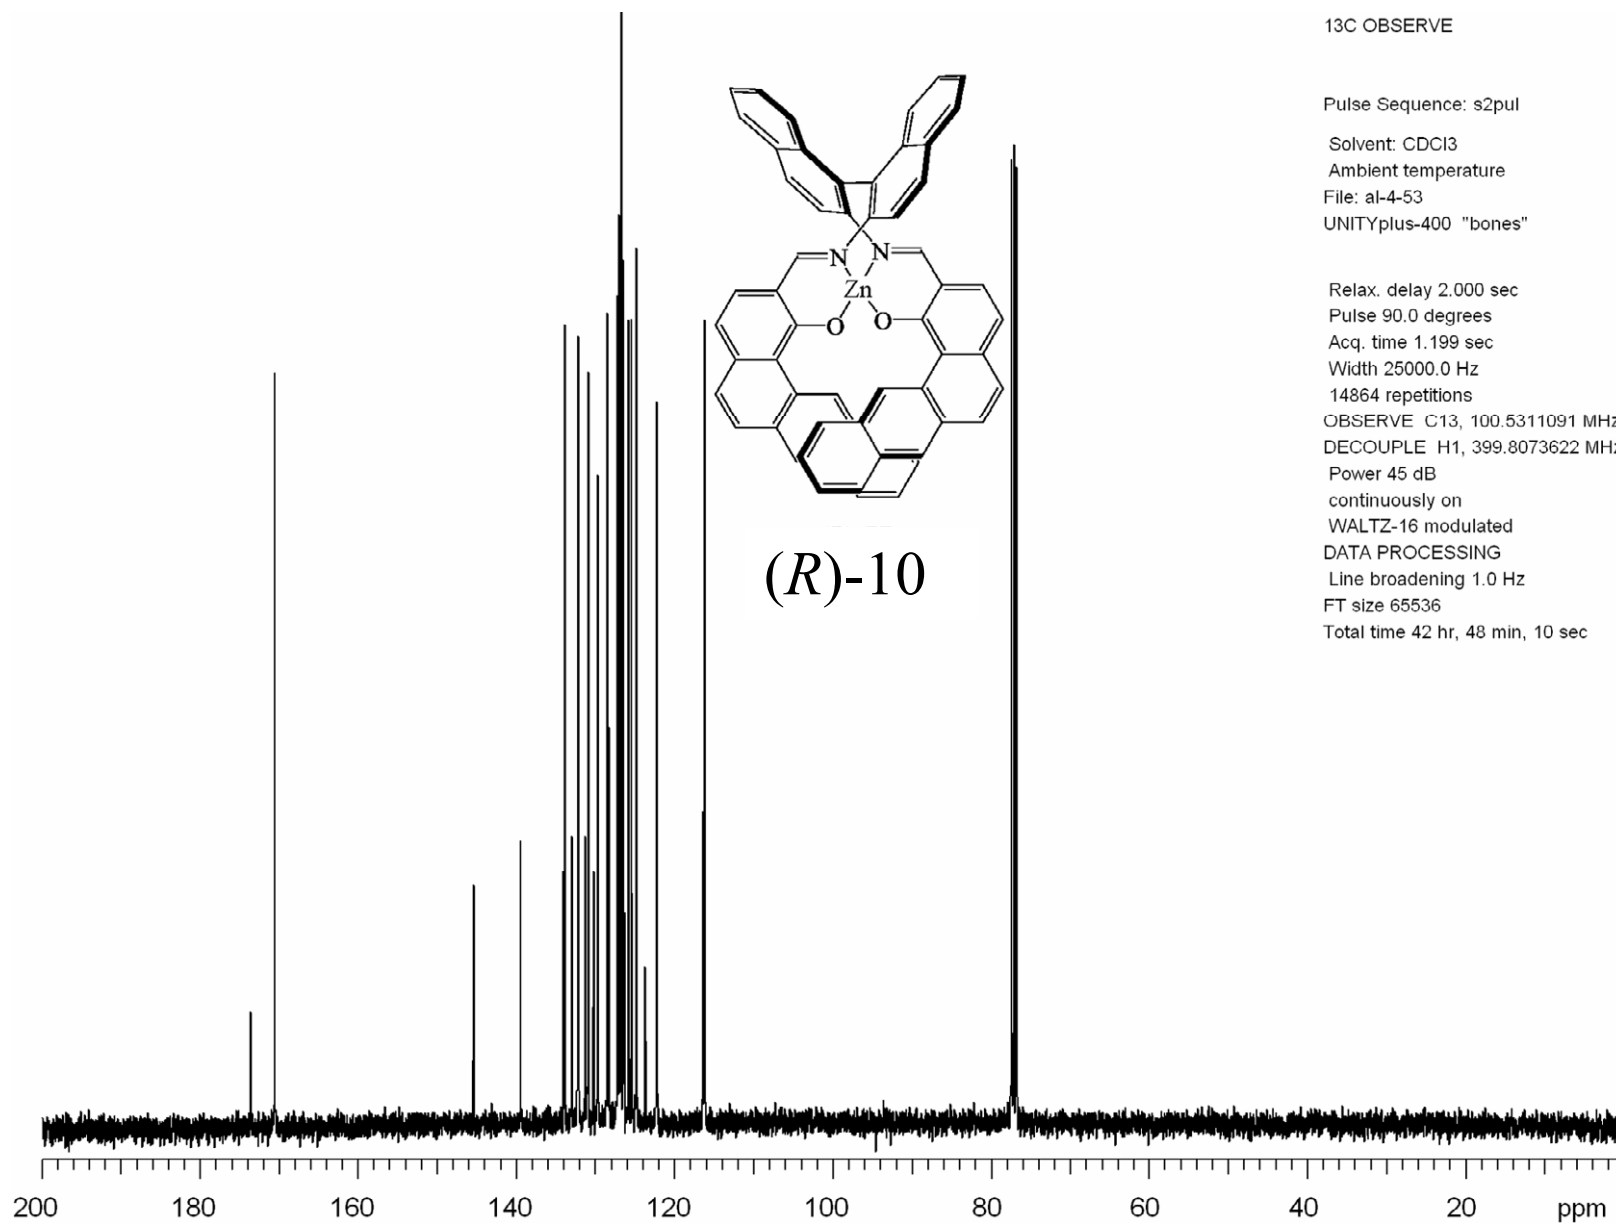

<sup>13</sup>C OBSERVE

Pulse Sequence: s2pul

Solvent: CDCl<sub>3</sub>

Ambient temperature

File: al-4-53

UNITYplus-400 "bones"

Relax. delay 2.000 sec

Pulse 90.0 degrees

Acq. time 1.199 sec

Width 25000.0 Hz

14864 repetitions

OBSERVE C13, 100.5311091 MHz

DECOUPLE H1, 399.8073622 MHz

Power 45 dB

continuously on

WALTZ-16 modulated

DATA PROCESSING

Line broadening 1.0 Hz

FT size 65536

Total time 42 hr, 48 min, 10 sec
